# Supplementary material for: Supramolecular polymerization and bulk properties relationship in ester-functionalized N-annulated perylenediimides
Source: Royal Society of Chemistry journal article supplement (doi:10.1039/d4sc03797a), 2024-01-01
Supplement: d4sc03797a1.pdf [file d4sc03797a1.pdf]

## Supporting Information

### Supramolecular polymerization and bulk properties relationship in ester-functionalized *N*-annulated perylene-3,4,9,10-tetracarboxylic diimides

Lucía López-Gandul,<sup>a,b</sup> Giulia Lavarda,<sup>b</sup> Bart W. L. van den Bersselaar,<sup>b</sup> Ghislaine Vantomme,<sup>b</sup> E. W. Meijer,<sup>\*b</sup> and Luis Sánchez <sup>a</sup>

<sup>a</sup> *Departamento de Química Orgánica, Facultad de Ciencias Químicas, Universidad Complutense de Madrid, E-28040 Madrid, Spain.*

<sup>b</sup> *Institute for Complex Molecular Systems and Laboratory of Macromolecular and Organic Chemistry, Eindhoven University of Technology, 5600 MB Eindhoven, The Netherlands*

#### Contents:

|                                                                                    |      |
|------------------------------------------------------------------------------------|------|
| 1. Materials and methods                                                           | S-2  |
| 2. Synthetic details and characterization                                          | S-3  |
| 3. NMR spectra                                                                     | S-6  |
| 4. Supplementary Figures                                                           | S-17 |
| Concentration dependent <sup>1</sup> H NMR spectra                                 | S-17 |
| UV-Vis spectra of NPDIs in different solvents                                      | S-18 |
| Emission spectra of NPDIs in different solvents                                    | S-18 |
| Cooling and heating curves of NPDIs                                                | S-18 |
| Zoomed plot of the cooling curves                                                  | S-19 |
| AFM images of NPDIs <b>2-4</b>                                                     | S-19 |
| POM images of NPDIs <b>1-4</b>                                                     | S-21 |
| SAXS spectra of NPDI <b>2</b>                                                      | S-22 |
| UV-Vis spectra of NPDI <b>3</b> and <b>4</b> in decaline at different temperatures | S-22 |
| Summary of SAXS data for <b>1-4</b>                                                | S-23 |
| 5. References                                                                      | S-24 |

## 1. Materials and methods

All solvents were dried according to standard procedures. Reagents were used as purchased. All air-sensitive reactions were carried out under argon atmosphere. Flash chromatography was performed using silica gel (Merck, Kieselgel 60, 230–240 mesh or Scharlau 60, 230–240 mesh). Analytical thin layer chromatography (TLC) was performed using aluminium-coated Merck Kieselgel 60 F254 plates. Matrix-assisted laser desorption/ionization (MALDI) high resolution mass spectra (HRMS) were recorded on a MALDI Bruker daltonics Ultraflex TOF/TOF spectrometer. DCTB was used as matrix. Nuclear magnetic resonance (NMR) spectra were recorded on a Bruker Avance 300 MHz spectrometer ( $^1\text{H}$ : 300 MHz;  $^{13}\text{C}$ : 75 MHz) at 298 K. Deuterated solvents were used as internal standards. Coupling constants ( $J$ ) are quoted in Hz and chemical shifts ( $\delta$ ) in ppm. Multiplicities are denoted as follows: s = singlet, d = doublet, t = triplet, m = multiplet, br = broad. Fourier Transform Infrared Spectroscopy (FT-IR) spectra were recorded on a Bruker Tensor 27 (ATR device) spectrometer.

UV-Vis absorption spectra were registered on a Jasco-V630 spectrophotometer equipped with a Peltier thermoelectric temperature controller. Circular dichroism (CD) measurements were performed in a Jasco-J1500 spectrophotometer equipped with a Peltier thermoelectric temperature controller (Jasco MCB-100 model). The spectra were recorded in the continuous mode between 750 and 220 nm, with a data pitch of 0.2 nm, a DIT of 1 s, and a bandwidth of 2 nm. 1 cm and a 1 mm path-length quartz cuvettes (Hellma) with screw cap were used. Emission spectra was recorded in a Jasco FP8300. The thermodynamic parameters associated to the supramolecular polymerization mechanism were derived by applying the Matlab® script built up to execute the one-component equilibrium model published by ten Eikelder and coworkers.<sup>S1</sup> To attain accurate values for the thermodynamic parameters, global fittings using four cooling curves, corresponding to four different concentrations of the monomer species, were performed. Fluorescence spectra were recorded on a JASCO FP-6300 fluorescence spectrometer at low sensitivity for the  $J$  aggregates and medium for the  $H$  ones.

Atomic force microscopy (AFM) was performed on a SPM Nanoscope IIIa multimode microscope working on tapping mode with a TESPSS tip (Veeco) at a working frequency of ~235 kHz. Differential scanning calorimetry (DSC) data were collected on a DSC Q2000 equipment from TA instruments, calibrated with an indium standard. The samples were weighed into aluminium pans and hermetically sealed. The samples were initially heated 20 °C above their melting point and then subjected to two cooling/heating cycles with a rate of 10 K min<sup>-1</sup>. Hereafter, a second measurement was performed with similar conditions with a heating/cooling rate of 2 K min<sup>-1</sup>. The data presented are the second heating and/or cooling cycle. Polarized optical microscopy (POM) images were recorded upon placing samples between two glass substrates and imaged using a Nikon Xfinity1 Lumenera microscope with 4x, 16x and 25x magnification. Two crossed linear polarizers were used to image the samples under polarized light. The samples were heated using a Linkam heating stage mounted in the POM set-up. Bulk small angle X-ray scattering (SAXS) was performed on a Ganesha 300XL instrument from SAXSLab. The flight tube and sample holder are all under vacuum in a single housing, with a GeniX-Cu ultra-low divergence X-ray generator. The source produces X-rays with a wavelength ( $\lambda$ ) of 0.154 nm and a flux of  $1 \times 10^8$  ph s<sup>-1</sup>. Scattered X-rays were captured on a 2-dimensional Pilatus 300K detector with 487 × 619 pixel resolution. The sample-to-detector distance was 0.084 m (WAXS mode) or 0.48 m (MAXS mode). The instrument was calibrated with diffraction patterns from silver behenate. The results are listed below.

## 2. Synthetic details and characterization

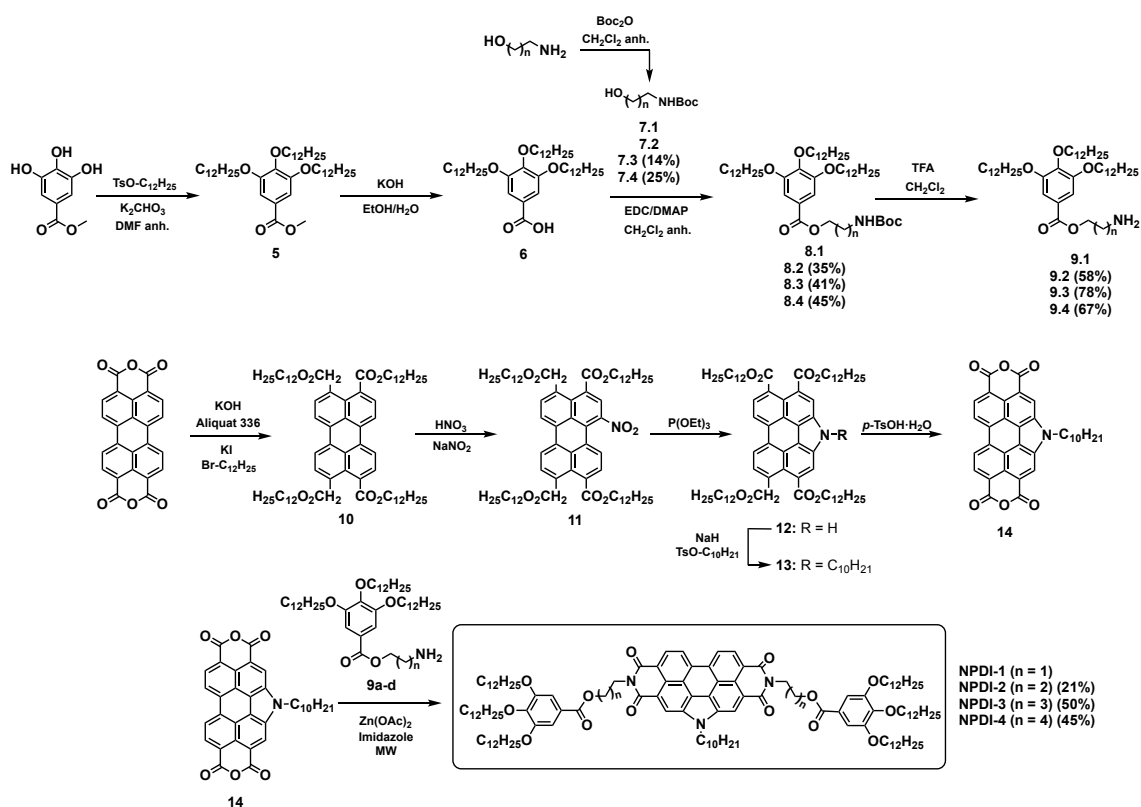

**Scheme 1.** Synthetic route for the preparation of the reported NPDIs **2-4**.

Compounds **5-14**<sup>S2,S3</sup> and NPB **1**<sup>S4</sup> were prepared according to previously reported synthetic procedures and the same amounts were used.

### Synthesis of the N-BOC protected aminoalcohols **7.3** and **7.4**.

The corresponding aminoalcohol (4-amino-1-butanol or 5-amino-1-pentanol; 11.24 mmol) is dissolved in anhydrous  $\text{CH}_2\text{Cl}_2$  (40 mL) under Ar atmosphere. After that, di-*tert*-butyl decarbonate (1.91 g, 11.24 mmol) is added in a mixture of  $\text{CH}_2\text{Cl}_2/\text{MeOH}$  (1:1) (20 mL) at 0 °C. The mixture is stirred for 24 h at room temperature. After this time, the reaction mixture is washed with  $\text{HCl}$  1 M (2 x 20 mL) and  $\text{H}_2\text{O}$  (2 x 20 mL). The organic layer is dried over  $\text{MgSO}_4$ , filtered and the solvent is removed in vacuo, obtaining **7** as a colourless oil. The product thus obtained is utilized in the next synthetic step without any further purification.

### Compounds **7**

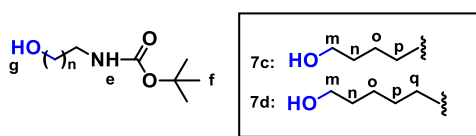

**7.3** ( $n = 3$ ): (yield: 14%).  $^1\text{H-NMR}$  (300 MHz,  $\text{CDCl}_3$ , 298 K)  $\delta$  (ppm): 4.87 (1H,  $\text{H}_e$ , s), 3.57 (2H,  $\text{H}_m$ , t,  $J = 6.0$  Hz), 3.22 (1H,  $\text{H}_g$ , s), 3.07 (2H,  $\text{H}_p$ , s), 1.51 (4H,  $\text{H}_{n,o}$ , t,  $J = 3.4$  Hz), 1.37 (9H,  $\text{H}_f$ , s).  $^{13}\text{C-NMR}$  (75 MHz,  $\text{CDCl}_3$ )  $\delta$  (ppm): 156.34, 79.16, 62.06, 40.34, 29.70, 28.43, 26.54. FT-IR: 3573.16, 3428.29, 3351.36, 2929.03, 2872.28, 1687.39, 1529.89, 1453.44, 1392.64, 1366.75, 1279.62, 1252.46, 1169.79, 1106.54, 1057.87, 1021.07, 651.57, 628.17  $\text{cm}^{-1}$ . HRMS (MALDI-TOF)  $m/z$ : calculated for  $\text{C}_9\text{H}_{19}\text{NO}_3$ : 189.1400, found: 212.1250 [ $\text{M}+\text{Na}$ ].

**7.4** ( $n = 4$ ): (yield: 25%).  $^1\text{H-NMR}$  (300 MHz,  $\text{CDCl}_3$ , 298 K)  $\delta$  (ppm): 4.67 (1H,  $\text{H}_e$ , br), 3.58 (2H,  $\text{H}_m$ , t,  $J = 6.84$  Hz), 3.07 (2H,  $\text{H}_q$ , t,  $J = 6.90$  Hz), 2.34 (1H,  $\text{H}_g$ , br), 1.58 – 1.31 (15H,  $\text{H}_{n,p,f}$ , m).  $^{13}\text{C-NMR}$  (75 MHz,  $\text{CDCl}_3$ , 298 K)  $\delta$  (ppm): 157.01, 79.19, 67.85, 62.53, 60.51, 40.61, 32.32, 30.11, 28.44, 23.14. FT-IR: 631.76, 757.95, 781.07, 867.26, 953.09, 1013.10, 1052.48, 1168.69, 1250.15, 1273.35, 1365.47, 1391.64, 1454.86, 1477.68, 1525.06, 1686.30, 2864.40, 2933.52, 2975.34, 3338.14. HRMS (MALDI-TOF)  $m/z$ : calculated for  $\text{C}_{10}\text{H}_{21}\text{NO}_3$ : 203.1521, found: 204.1588 [ $\text{M}+\text{H}$ ].

### Synthesis of the trialkoxybenzoate esters **8**.

A mixture of EDC (1.1 eq) and DMAP (1.1 eq) is added in the solid state over a solution of **6** (989 mg, 1.47 mmol) in anhydrous  $\text{CH}_2\text{Cl}_2$  (10 mL) under Ar atmosphere and 0 °C. After stirring for 15 min, a solution of **7** (1.1 eq) in anhydrous

CH<sub>2</sub>Cl<sub>2</sub> (10 mL) is added dropwise at 0 °C. The reaction is then stirred for 24 h at room temperature. After this time, the crude is washed with HCl 1 M (2 x 20 mL), NaOH 2 M (2 x 20 mL) and H<sub>2</sub>O (2 x 20 mL). Then, the organic layers are dried over MgSO<sub>4</sub>, filtered and dried in vacuo, obtaining product **8** as a pale brown solid. The product thus obtained is utilized in the next synthetic step without any further purification.

### Compounds 8

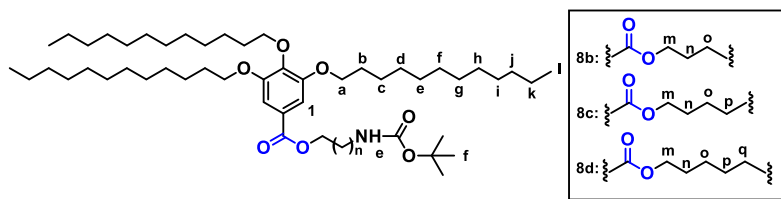

**8.2 (n = 2):** (35%). <sup>1</sup>H-RMN (300 MHz, CDCl<sub>3</sub>, 298K) δ (ppm): 7.21 (s, 2H, H<sub>1</sub>), 5.23 (s, 1H, H<sub>e</sub>), 4.33 (t, 2H, H<sub>m</sub>, J = 6.09 Hz), 4.01 - 3.92 (m, 8H, H<sub>a,o</sub>), 3.22 (m, 2H, H<sub>n</sub>), 1.92 (m, 2H, H<sub>b</sub>), 1.81 - 1.51 (m, 4H, H<sub>c,d</sub>), 1.48 - 1.10 (m, 14H, H<sub>e-k</sub>), 1.47 (s, 9H, H<sub>f</sub>), 0.83 (m, 9H, H<sub>i</sub>). <sup>13</sup>C-RMN (75 MHz, CDCl<sub>3</sub>) δ (ppm): 152.9, 142.6, 124.7, 108.2, 77.6, 77.2, 76.8, 73.6, 69.3, 62.5, 32.0, 31.7, 30.4, 29.7, 29.5, 28.5, 26.2, 22.8. FT-IR: 3403.10, 2981.41, 2936.56, 1807.79, 1757.20, 1690.06, 1807.79, 1757.20, 1690.06, 1515.57, 1477.48, 1458.83, 1395.43, 1307.41, 1255.05, 1211.765, 1168.40, 1114.66, 1062.22, 996.22, 950.46, 913.27, 866.10, 842.93, 775.79, 736.24, 703.38, 662.79, 518.2 cm<sup>-1</sup>. HRMS (MALDI-TOF) m/z: calculated for C<sub>51</sub>H<sub>93</sub>NO<sub>7</sub>: 831.7005, found: 831.7788 [M]<sup>+</sup>.

**8.3 (n = 3):** (41%). <sup>1</sup>H-NMR (300 MHz, CDCl<sub>3</sub>, 298 K) δ (ppm) 7.22 (2H, H<sub>1</sub>, s), 4.63 (1H, H<sub>e</sub>, s), 4.29 (2H, H<sub>m</sub>, t, J=6.46 Hz), 3.99 (6H, H<sub>a</sub>, t, J=6.42 Hz), 3.17 (2H, H<sub>p</sub>, c, J=6.42 Hz), 1.85 - 1.66 (8H, H<sub>b,n</sub>, m), 1.66-1.53 (2H, H<sub>o</sub>, m), 1.52 - 1.44 (6H, H<sub>c</sub>, m), 1.43-1.39 (9H, H<sub>f</sub>, m), 1.33-1.20 (48H, H<sub>d-k</sub>, m), 0.85 (9H, H<sub>i</sub>, t, J = 6.40 Hz). <sup>13</sup>C-NMR (75 MHz, CDCl<sub>3</sub>) δ (ppm): 166.47, 156.03, 152.89, 142.51, 124.91, 108.09, 79.17, 73.54, 69.26, 64.64, 63.01, 40.31, 32.00, 30.41, 29.80, 29.78, 29.74, 29.72, 29.65, 29.49, 29.45, 29.41, 28.46, 26.24, 26.18, 26.15, 25.86, 22.73, 14.14. FT-IR: 3383.72, 2921.85, 2852.79, 1715.68, 1586.30, 1500.29, 1465.65, 1429.22, 1388.70, 1365.26, 1332.38, 1246.80, 1214.00, 1171.98, 1111.97, 1034.94, 864.31, 764.47, 721.39 cm<sup>-1</sup>. HRMS (MALDI-TOF) m/z: calculated for C<sub>52</sub>H<sub>97</sub>NO<sub>7</sub>: 845.71, found: 845.7181 [M]<sup>+</sup>.

**8.4 (n = 4):** (45%). <sup>1</sup>H-RMN (300 MHz, CDCl<sub>3</sub>, 298K) δ (ppm): 7.23 (2H, H<sub>1</sub>, s), 4.55 (1H, H<sub>e</sub>, br), 4.29 (2H, H<sub>m</sub>, t, J = 7.08 Hz), 4.00 (6H, H<sub>a</sub>, t, J = 6.49 Hz), 3.13 (2H, H<sub>a</sub>, m), 1.78 (8H, H<sub>b,n</sub>, m), 1.60 - 1.45 (4H, H<sub>o,p</sub>, m), 1.42 (9H, H<sub>f</sub>, s), 1.38 - 1.15 (48H, H<sub>d-k</sub>, br), 0.88 (9H, H<sub>i</sub>, t, J = 6.36 Hz). <sup>13</sup>C-RMN (75 MHz, CDCl<sub>3</sub>, 298K) δ (ppm): 166.91, 156.42, 153.11, 142.43, 125.01, 108.54, 79.25, 73.63, 96.42, 64.86, 40.63, 32.12, 30.54, 29.90, 29.82, 29.80, 29.76, 29.74, 29.67, 29.50, 29.49, 29.47, 29.42, 28.59, 28.50, 23.41, 22.82, 14.22. FT-IR: 524.68, 575.14, 721.27, 765.11, 865.03, 1004.20, 1040.09, 1114.29, 1173.57, 1214.67, 1244.69, 1333.68, 1365.34, 1389.02, 1429.58, 1465.99, 1500.28, 1586.64, 1716.79, 2853.22, 2922.46, 3402.81. HRMS (MALDI-TOF) m/z: calculated for C<sub>53</sub>H<sub>97</sub>NO<sub>7</sub>: 859.7265, found: 859.8257 [M]<sup>+</sup>.

### Synthesis of aminoesters 9. General procedure.

Trifluoroacetic acid is added dropwise over a solution of **8** (515 mg, 0.61 mmol) in CH<sub>2</sub>Cl<sub>2</sub> (10 mL). After stirring 2h at room temperature, the crude is washed with H<sub>2</sub>O. The organic layer is then dried over MgSO<sub>4</sub>, filtered and dried in vacuo, obtaining product **9** as a pale brown solid. The product thus obtained is utilized in the next synthetic step without any further purification.

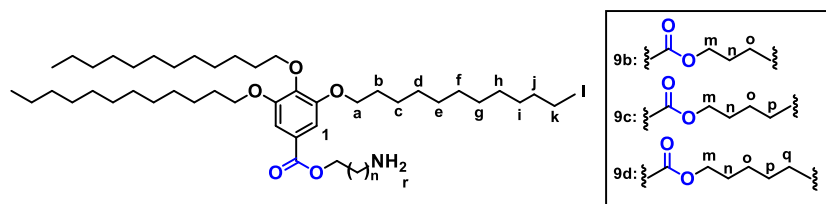

**9.2 (n = 2):** (58%). <sup>1</sup>H-RMN (300 MHz, CDCl<sub>3</sub>, 298 K) δ(ppm): 7.20 (s, 2H, H<sub>1</sub>), 4.44 (t, 2H, H<sub>m</sub>, J = 5.85 Hz), 4.04 - 3.93 (m, 8H, H<sub>a+n</sub>), 3.18 (t, 2H, H<sub>r</sub>, J = 6.32 Hz), 2.35-2.21 (m, 2H, H<sub>o</sub>), 1.86-1.65 (m, 8H, H<sub>b</sub>), 1.53 - 1.18 (m, 54H, H<sub>c-k</sub>), 0.88-0.84 (m, 9H, H<sub>i</sub>). <sup>13</sup>C-RMN (75 MHz, CDCl<sub>3</sub>) δ (ppm): 166.9, 153.1, 143.0, 124.0, 108.3, 77.6, 77.2, 76.7, 73.7, 69.4, 61.5, 32.1, 30.6, 29.9, 29.5, 26.3, 22.8, 14.2. FT-IR: 2920.37, 2852.02, 1712.10, 1587.80, 1532.63, 1500.12, 1466.83, 1430.60, 1384.07, 1335.48, 1214.93, 1116.27, 1061.97, 1007.67, 862.90, 759.20, 722.23, 577.23, 544.32, 513.50 cm<sup>-1</sup>. HRMS (MALDI-TOF) m/z: calculated for C<sub>46</sub>H<sub>85</sub>NO<sub>5</sub>: 731.6165, found: 732.6506 [M]<sup>+</sup>.

**9.3 (n = 3)** (78%). <sup>1</sup>H-NMR (300 MHz, CDCl<sub>3</sub>, 298 K) δ (ppm): 8.29 (2H, H<sub>r</sub>, s), 7.21 (2H, H<sub>1</sub>, s), 4.31 (2H, H<sub>m</sub>, s), 3.99 (6H, H<sub>a</sub>, t, J=6.42 Hz), 3.07 (2H, H<sub>p</sub>, s), 1.94 - 1.85 (4H, H<sub>n,o</sub>, m), 1.85 - 1.73 (6H, H<sub>b</sub>, m), 1.49-1.42 (6H, H<sub>c</sub>, m), 1.33 - 1.20 (48H, H<sub>d-k</sub>, m), 0.85 (9H, H<sub>i</sub>, t, J = 6.34 Hz). <sup>13</sup>C-NMR (75 MHz, CDCl<sub>3</sub>) δ (ppm): 166.55, 152.98, 142.71, 124.57, 108.17, 73.62, 69.35, 63.83, 39.63, 32.04, 30.47, 29.86, 29.83, 29.77, 29.71, 29.57, 29.48, 26.25, 26.19, 25.97, 24.34, 22.81, 14.22. FT-IR: 3448.37, 2953.98, 2918.16, 2849.92, 1705.80, 1587.07, 1502.02, 1467.25, 11429.68, 1387.75, 1335.77, 1252.61, 1217.01, 1117.33, 1012.07, 763.43, 721.19 cm<sup>-1</sup>. HRMS (MALDI-TOF) m/z: calculated for C<sub>47</sub>H<sub>87</sub>NO<sub>5</sub>: 745.6689, found: 746.6628 [M+H]<sup>+</sup>.

**9.4 (n = 4):** (67%). <sup>1</sup>H-RMN (300 MHz, CDCl<sub>3</sub>, 298K) δ (ppm): 7.21 (2H, H<sub>1</sub>, s), 4.55 (1H, H<sub>r</sub>, br), 4.30 (2H, H<sub>m</sub>, t, J = 7.08 Hz), 3.99 (6H, H<sub>a</sub>, t, J = 6.49 Hz), 3.02 (2H, H<sub>q</sub>, m), 1.78 (6H, H<sub>n-p</sub>, m), 1.60 – 1.45 (6H, H<sub>b</sub>, m), 1.42, 1.38 – 1.15 (48H, H<sub>d-k</sub>, br), 0.88 (9H, H<sub>l</sub>, t, J = 6.36 Hz). <sup>13</sup>C-RMN (75 MHz, CDCl<sub>3</sub>, 298K) δ (ppm): 166.92, 153.15, 142.48, 125.08, 108.51, 79.28, 73.65, 96.48, 64.87, 40.63, 32.12, 30.54, 29.90, 29.82, 29.80, 29.76, 29.74, 29.67, 29.50, 29.49, 29.42, 28.50, 23.41, 22.82, 14.21. FT-IR: 3448.47, 2953798, 2918.56, 2849.92, 1705.80, 1587.07, 1502.02, 1467.25, 11429.68, 1387.75, 1335.78, 1252.61, 1217.01, 1117.45, 1012.07, 763.43, 721.89 cm<sup>-1</sup>. HRMS (MALDI-TOF) m/z: calculated for C<sub>48</sub>H<sub>89</sub>NO<sub>5</sub>: 759.6741, found: 760.6838 [M+H]<sup>+</sup>.

#### Synthesis of N-annulated perylendiimides 2-4.

In a microwave vial, dihydride **14** (50 mg, 0.09 mmol), the corresponding aminoester **9** (2.2 eq), zinc acetate (1 eq) and imidazole (500 mg, 7.344 mmol) are added. After performing 3 Ar/vacuo cycles, the mixture is reacted under microwave radiation for 35 min (165 °C). After this time, the crude is extracted with CH<sub>2</sub>Cl<sub>2</sub> and washed with H<sub>2</sub>O, dried over MgSO<sub>4</sub> and dried in vacuo. The final NPDI is purified by column chromatography (silica gel, CH<sub>2</sub>Cl<sub>2</sub>), obtaining the final product as a waxy, red compound. This compound is redissolved in the minimum amount of CH<sub>2</sub>Cl<sub>2</sub> and precipitated with methanol, yielding a red powder as a final product.

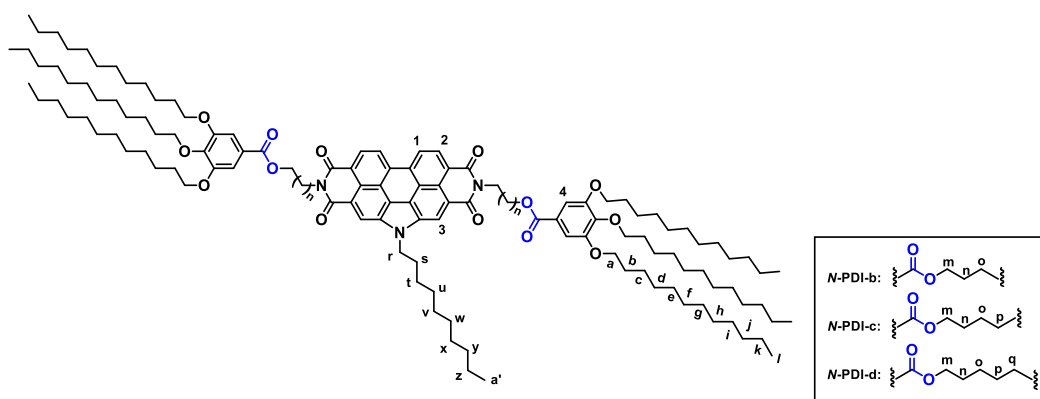

**NPDI-2 (n = 2):** (21%). <sup>1</sup>H-RMN (300 MHz, CDCl<sub>3</sub>, 298 K) δ (ppm): 8.76 (s, 2H, H<sub>3</sub>), 8.70 (d, 2H, H<sub>2</sub>, J = 8.02 Hz), 8.65 (d, 2H, H<sub>1</sub>, J = 8.3 Hz), 7.22 (s, 4H, H<sub>4</sub>), 4.79 (t, 2H, H<sub>r</sub>, J = 6.75 Hz), 4.52 (m, 8H, H<sub>m,o</sub>), 3.93 – 3.80 (m, 12H, H<sub>a</sub>), 2.41-2.30 (m, 4H, H<sub>n</sub>), 2.19-2.07 (m, 2H, H<sub>s</sub>), 1.75-1.60 (m, 12H, H<sub>b</sub>), 1.40 – 1.19 (m, 124H, H<sub>b-j</sub>, y H<sub>t-z</sub>), 0.90-0.78 (m, 21H, H<sub>a,i</sub>). <sup>13</sup>C-RMN (75 MHz, CDCl<sub>3</sub>) δ (ppm): 166.4, 165.0, 163.6, 152.8, 142.2, 134.5, 132.6, 125, 124.4, 123.6, 122.1, 121.4, 119.2, 118.7, 108.1, 77.5, 77.0, 76.6, 73.3, 69.1, 63.3, 32.0, 30.4, 29.7, 29.5, 29.2, 26.1, 22.7, 14.2. FT-IR: 721.46, 763.08, 804.29, 1122.40, 1219.54, 1335.16, 1398.71, 1443.07, 1467.44, 1601.82, 1662.37, 1693.20, 2851.43, 2920.23 cm<sup>-1</sup>. HRMS (MALDI-TOF) m/z: calculated for C<sub>126</sub>H<sub>193</sub>N<sub>3</sub>O<sub>14</sub>: 1972.4584, found: 1972.446 [M]<sup>+</sup>.

**NPDI-3 (n = 3):** (50%). <sup>1</sup>H-NMR (300 MHz, CDCl<sub>3</sub>, 298 K) δ (ppm): 8.71 (2H, H<sub>1</sub>, s), 8.59 (4H, H<sub>2,3</sub>, s), 7.26 (4H, H<sub>4</sub>, s), 4.78 (2H, H<sub>r</sub>, t, J = 6.75 Hz), 4.43 (8H, H<sub>m,p</sub>, s), 4.00 (12H, H<sub>a</sub>, t, J = 6.55 Hz), 2.19-2.06 (2H, H<sub>s</sub>, m), 2.05-1.95 (8H, H<sub>n,o</sub>, m), 1.86-1.61 (12 H, H<sub>b</sub>, m), 1.51-1.15 (122 H, H<sub>c-k,t-z</sub>, m), 0.92-0.77 (21H, H<sub>l,a'</sub>, m). <sup>13</sup>C-NMR (75 MHz, CDCl<sub>3</sub>) δ (ppm): 166.55, 164.88, 163.64, 152.88, 142.42, 134.45, 132.26, 127.33, 125.03, 124.11, 123.53, 122.04, 121.40, 121.26, 118.98, 118.46, 108.13, 73.56, 69.27, 64.82, 40.55, 32.04, 32.02, 31.88, 31.68, 30.44, 29.84, 29.80, 29.74, 29.69, 29.53, 29.49, 29.46, 29.29, 27.28, 26.67, 26.21, 26.18, 25.11, 22.78, 22.70, 14.21, 14.15. FT-IR: 2955.33, 2921.66, 2852.06, 1691.98, 1660.89, 1601.09, 1466.34, 1431.77, 1379.32, 1360.13, 1333.44, 1310.63, 1255.33, 1218.96, 1120.43, 804.24, 761.94, 740.57, 721.52, 619.15 cm<sup>-1</sup>. HRMS (MALDI-TOF) m/z: calculated for C<sub>128</sub>H<sub>197</sub>N<sub>3</sub>O<sub>14</sub>: 2000.4885, found: 2001.4770 [M+H]<sup>+</sup>.

**NPDI-4 (n = 4):** (45%). <sup>1</sup>H-RMN (300 MHz, CDCl<sub>3</sub>, 298K) δ (ppm): 8.75 (2H, H<sub>1</sub>, s), 8.62 (4H, H<sub>2,3</sub>, m), 7.24 (4H, H<sub>4</sub>, s), 4.79 (2H, H<sub>r</sub>, t, J = 7.73 Hz), 4.36 (8H, H<sub>m,q</sub>, t, J = 6.87 Hz), 3.98 (12H, H<sub>a</sub>, t, J = 6.50 Hz), 2.13 (2H, H<sub>s</sub>, m), 1.93 (12H, H<sub>n-p</sub>, m), 1.83 – 1.58 (12H, H<sub>b</sub>, m), 1.52 – 1.14 (122H, H<sub>c-k,t-z</sub>, m), 0.85 (21H, H<sub>l,a'</sub>, m). <sup>13</sup>C-RMN (75 MHz, CDCl<sub>3</sub>, 298K) δ (ppm): 166.63, 164.98, 163.74, 125.92, 142.43, 134.57, 127.42, 125.15, 124.19, 123.66, 122.12, 121.48, 121.40, 119.13, 118.56, 108.13, 73.60, 69.30, 65.08, 32.08, 32.06, 31.91, 30.48, 29.87, 29.84, 29.78, 29.73, 29.56, 29.53, 29.50, 29.32, 28.71, 28.11, 27.32, 26.24, 26.21, 23.79, 22.84, 22.82, 22.73, 14.24, 14.19. FT-IR: 721.46, 763.08, 804.29, 1122.40, 1219.54, 1335.16, 1398.71, 1443.07, 1467.44, 1601.82, 1662.37, 1693.20, 2851.43, 2920.23 cm<sup>-1</sup>. HRMS (MALDI-TOF) m/z: calculated for C<sub>130</sub>H<sub>201</sub>N<sub>3</sub>O<sub>14</sub>: 2028.5109, found: 2029.5068 [M+H]<sup>+</sup>.

### 3. NMR spectra

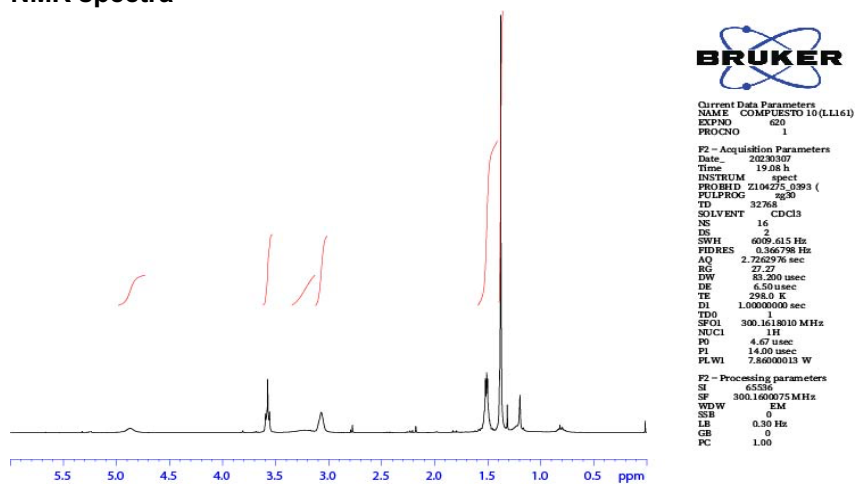

Figure 1:  $^1\text{H}$  NMR spectra ( $\text{CDCl}_3$ , 300 MHz, 298 K) of compound 7.3.

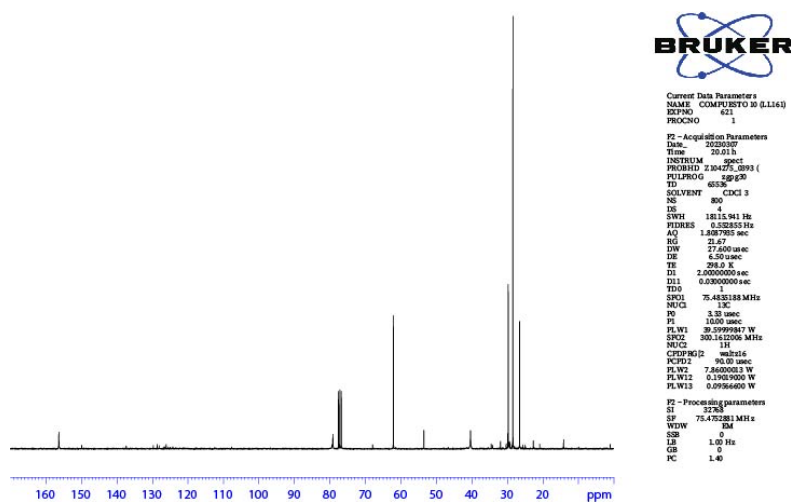

Figure 2:  $^{13}\text{C}$  NMR spectra ( $\text{CDCl}_3$ , 75 MHz, 298 K) of compound 7.3.

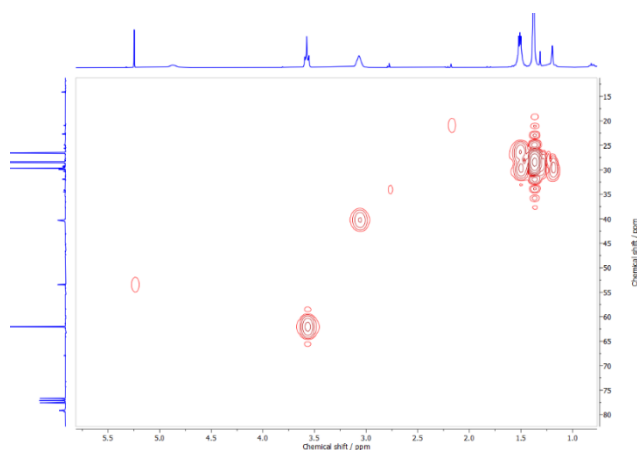

Figure 3:  $^1\text{H}$ ,  $^{13}\text{C}$  HMQC spectra ( $\text{CDCl}_3$ , 298 K) of compound 7.3.

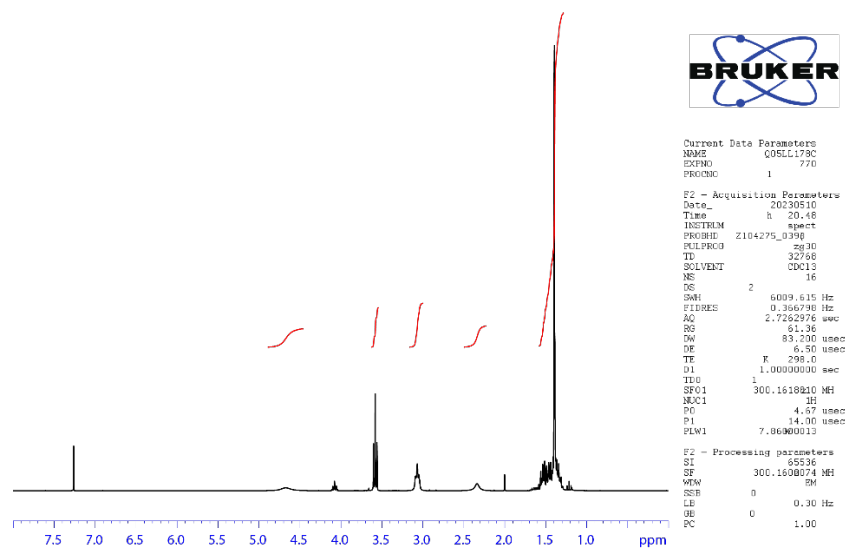

$^1\text{H}$  NMR spectra ( $\text{CDCl}_3$ , 300 MHz, 298 K) of compound **7.4**.

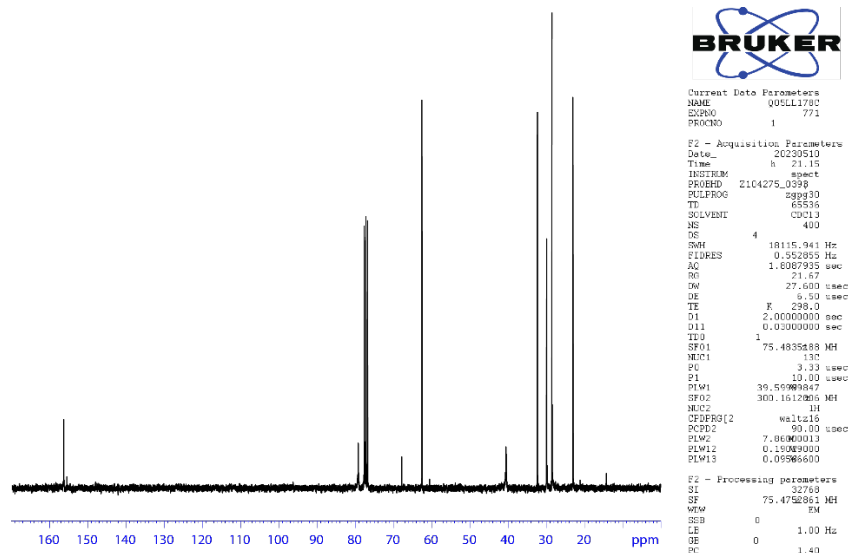

$^{13}\text{C}$  NMR spectra ( $\text{CDCl}_3$ , 75 MHz, 298 K) of compound **7.4**.

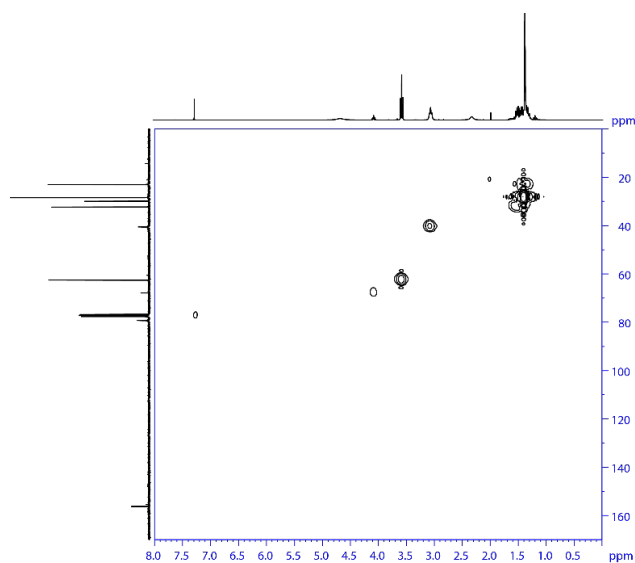

$^1\text{H}$ ,  $^{13}\text{C}$  HMQC spectra ( $\text{CDCl}_3$ , 298 K) of compound **7.4**.

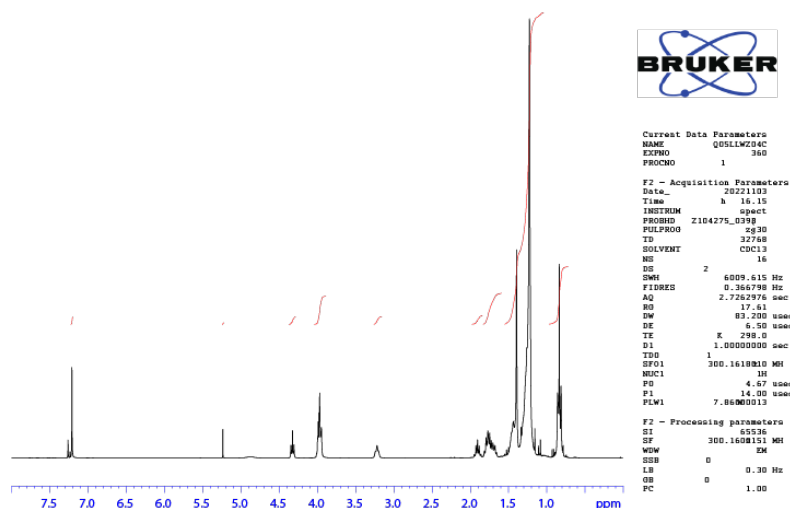

$^1\text{H}$  NMR spectra ( $\text{CDCl}_3$ , 300 MHz, 298 K) of compound **8.2**.

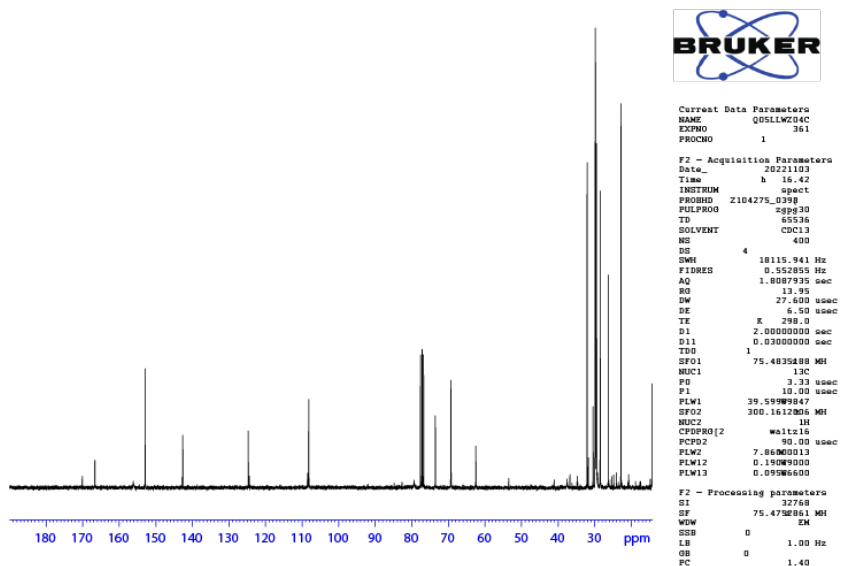

$^{13}\text{C}$  NMR spectra ( $\text{CDCl}_3$ , 300 MHz, 298 K) of compound **8.2**.

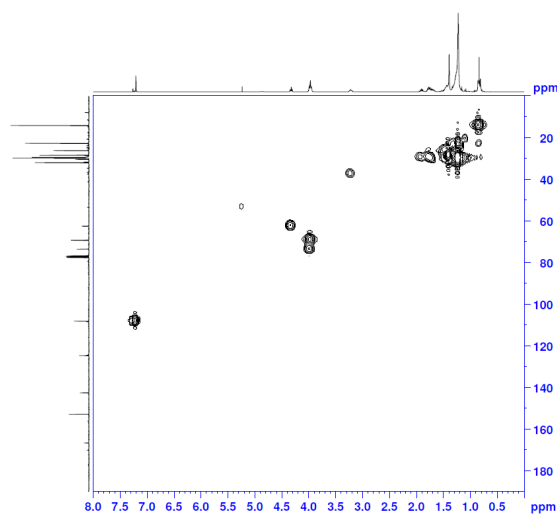

$^1\text{H}$ ,  $^{13}\text{C}$  HMQC spectra ( $\text{CDCl}_3$ , 298K) of compound **8.2**.



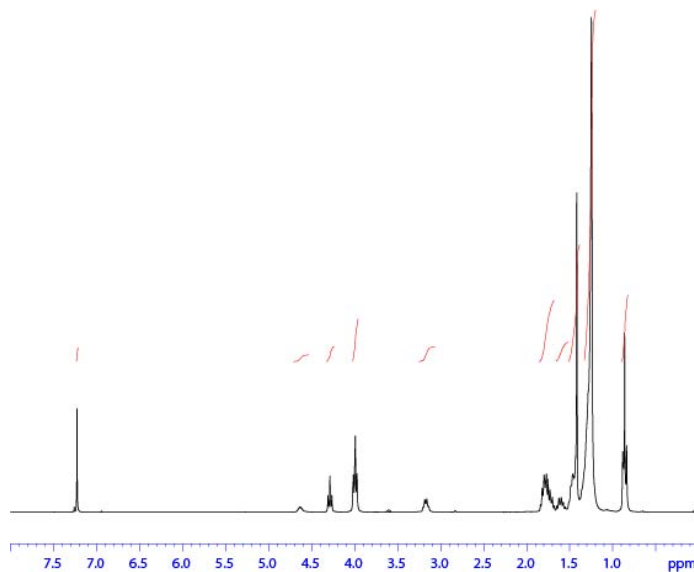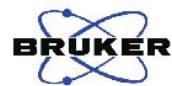

Current Data Parameters  
 NAME COMPUSTO 11 (L1169)  
 EXPNO 560  
 PROCNO 1

F2 - Acquisition Parameters  
 Date\_ 20230413  
 Time 20.37 h  
 INSTRUM spect  
 PROBHD Z104Z75.0393 (  
 PULPROG zg30  
 TD 32768  
 SOLVENT CDCl3  
 NS 16  
 DS 2  
 SWH 6069.615 Hz  
 FIDRES 0.366798 Hz  
 AQ 2.7262976 sec  
 RG 19.04  
 DW 83.200 usec  
 DE 6.50 usec  
 TE 298.0 K  
 D1 1.0000000 sec  
 TDO 1  
 SFO1 300.1618010 MHz  
 NUC1 1H  
 P0 4.67 usec  
 P1 14.00 usec  
 PLW1 7.86000013 W

F2 - Processing parameters  
 SI 65336  
 SF 300.160073 MHz  
 WDW EM  
 SSB 0  
 LB 0.30 Hz  
 GB 0  
 PC 1.00

<sup>1</sup>H NMR spectra (CDCl<sub>3</sub>, 300 MHz, 298 K) of compound **8.3**.

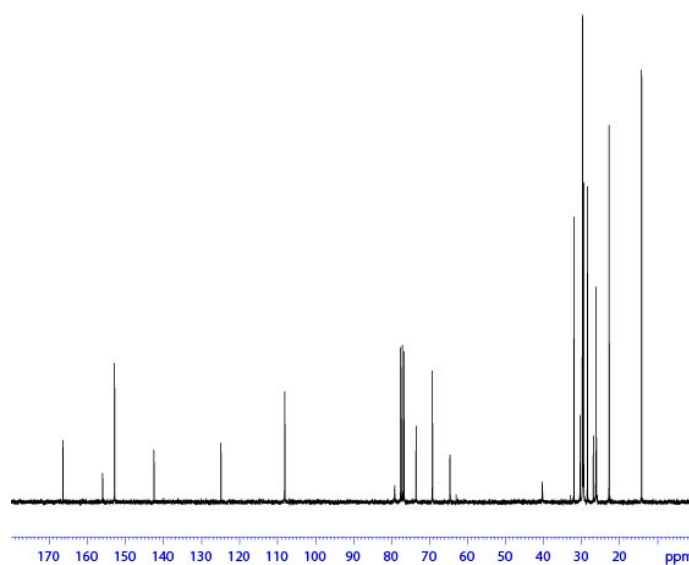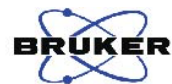

Current Data Parameters  
 NAME COMPUSTO 13 (L1169)  
 EXPNO 561  
 PROCNO 1

F2 - Acquisition Parameters  
 Date\_ 20230413  
 Time 21.04 h  
 INSTRUM spect  
 PROBHD Z104Z75.0398 (  
 PULPROG zgpg30  
 TD 65336  
 SOLVENT CDCl3  
 NS 400  
 DS 4  
 SWH 18111.941 Hz  
 FIDRES 0.532855 Hz  
 AQ 1.8087935 sec  
 RG 13.95  
 DW 27.600 usec  
 DE 6.50 usec  
 TE 298.0 K  
 D1 2.0000000 sec  
 D11 0.0300000 sec  
 TDO 1  
 SFO1 75.483188 MHz  
 NUC1 13C  
 P0 3.33 usec  
 P1 10.00 usec  
 PLW1 39.29999847 W  
 SFO2 300.1612096 MHz  
 NUC2 1H  
 CFIOPRG2 waltz16  
 ICFD2 90.00 usec  
 PLW2 7.86000013 W  
 PLW12 0.19039000 W  
 PLW13 0.09566600 W

F2 - Processing parameter  
 SI 32238  
 SF 75.4752287 MHz  
 WDW EM  
 SSB 0  
 LB 1.00 Hz  
 GB 0  
 PC 1.40

<sup>13</sup>C NMR spectra (CDCl<sub>3</sub>, 75 MHz, 298 K) of compound **8.3**.

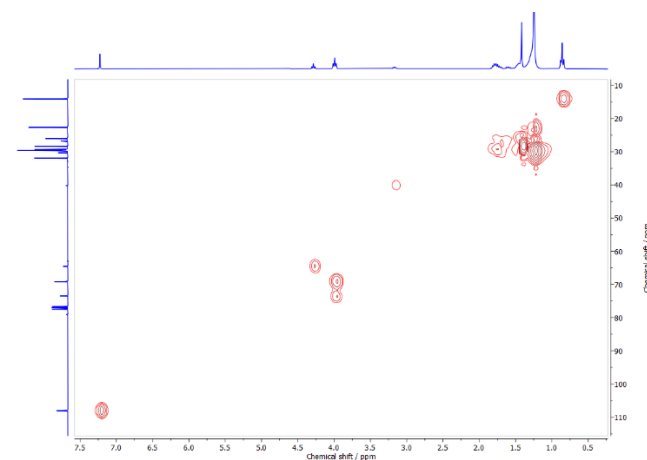

<sup>1</sup>H, <sup>13</sup>C HMQC spectra (CDCl<sub>3</sub>, 298 K) of compound **8.3**.

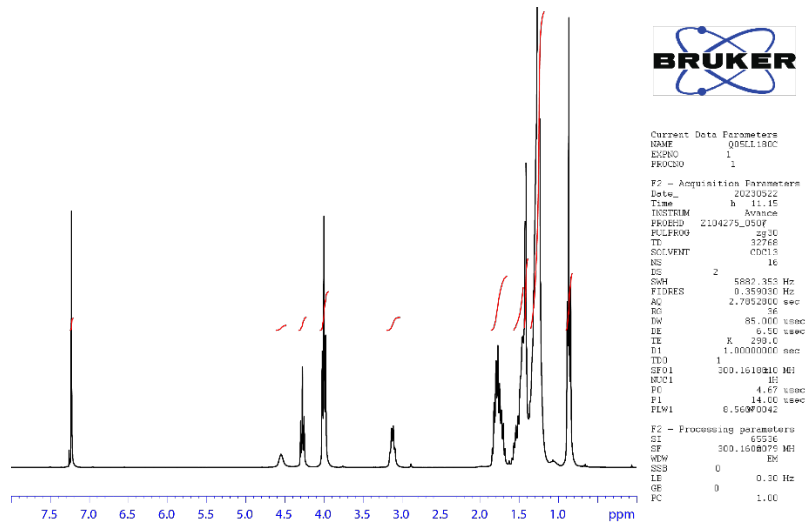

$^1\text{H}$  NMR spectra ( $\text{CDCl}_3$ , 300 MHz, 298 K) of compound **8.4**.

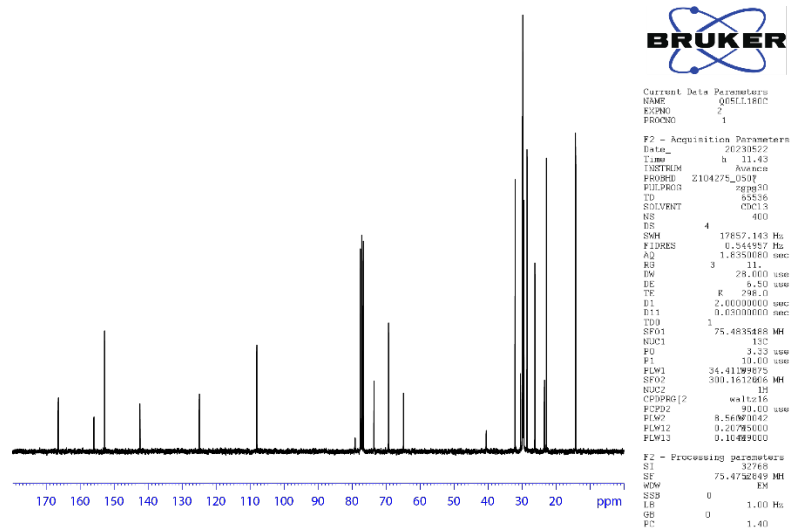

$^{13}\text{C}$  NMR spectra ( $\text{CDCl}_3$ , 75 MHz, 298 K) of compound **8.4**.

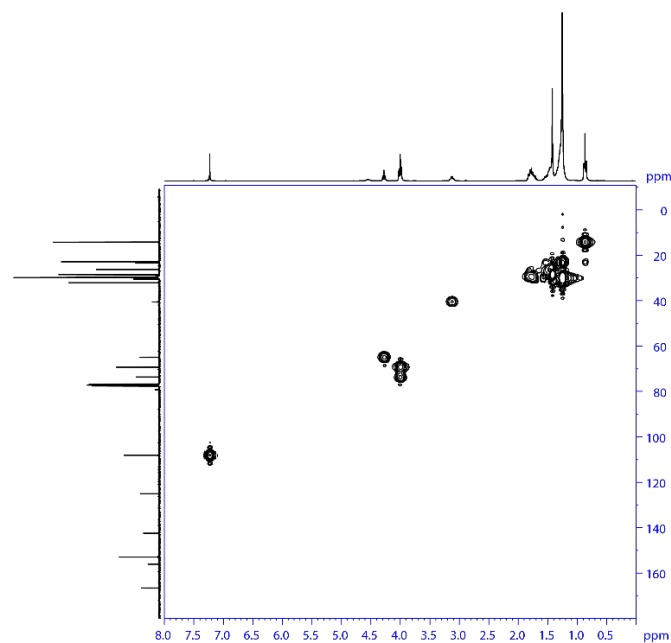

$^1\text{H}$ ,  $^{13}\text{C}$  HMQC spectra ( $\text{CDCl}_3$ , 298 K) of compound **8.4**.

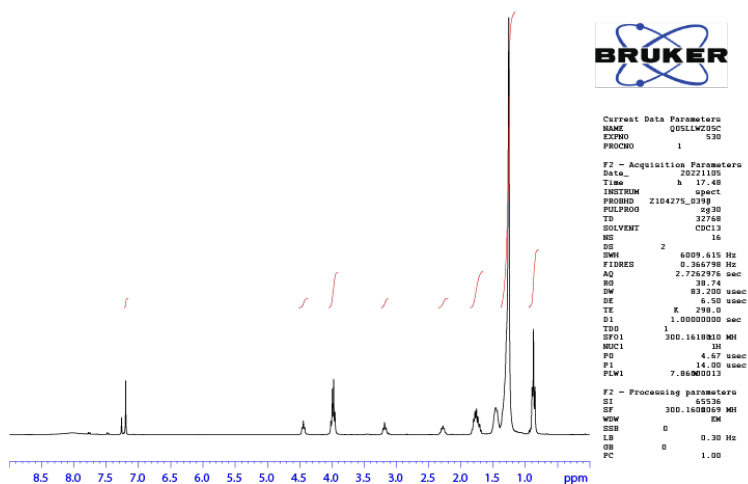

$^1\text{H}$  NMR spectra ( $\text{CDCl}_3$ , 300 MHz, 298 K) of compound **9.2**.

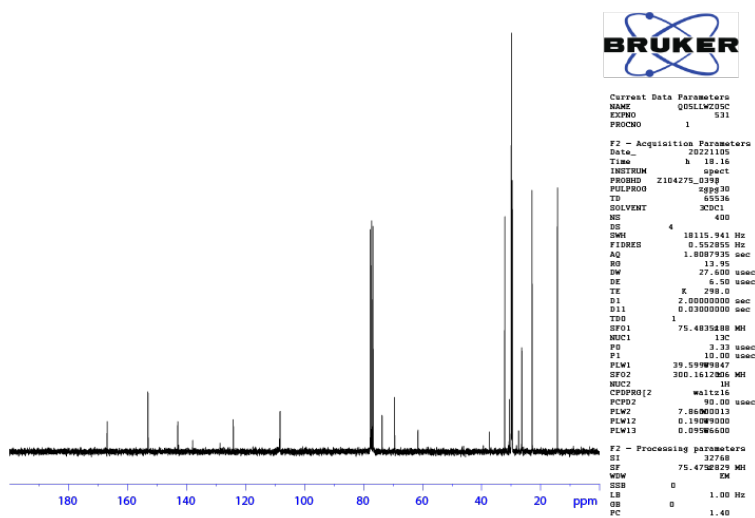

$^{13}\text{C}$  NMR spectra ( $\text{CDCl}_3$ , 300 MHz, 298 K) of compound **9.2**.

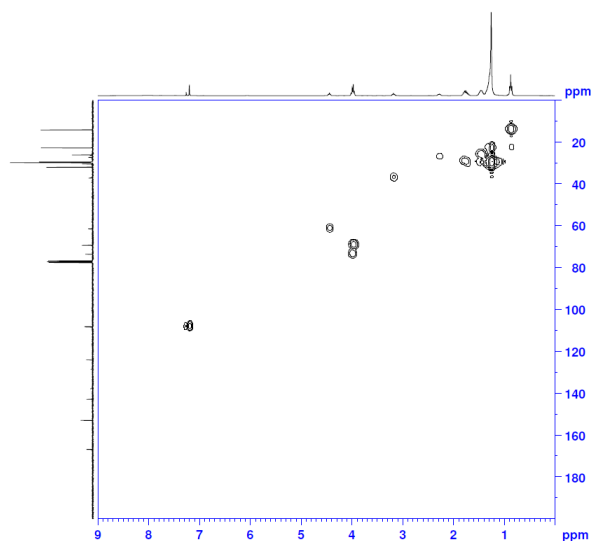

$^1\text{H}$ ,  $^{13}\text{C}$  HMQC spectra ( $\text{CDCl}_3$ , 298K) of compound **9.2**.

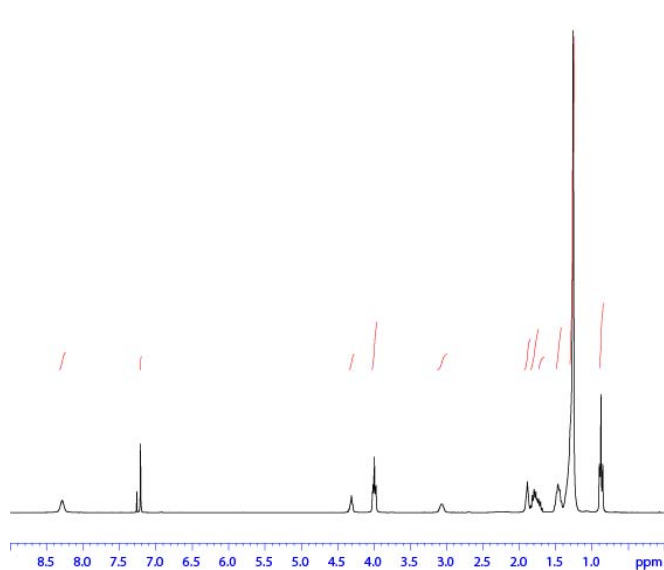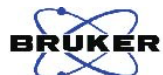

```

Current Data Parameters
NAME      Q05LLE18C
EXPNO    1
PROCNO   1

F2 - Acquisition Parameters
Date_    20230417
Time     11.10h
INSTRUM  Avance
PROBHD   Z104275_0507 (
PULPROG  zg30
TD        32768
SOLVENT  CDCl3
NS        16
DS        2
SWH       5882.353 Hz
FIDRES    0.359030 Hz
AQ        2.7852800 sec
RG        101
DW        85.000 usec
DE        6.50 usec
TE        297.9 K
D1        1.00000000 sec
TDO       1
SFO1     300.1618010 MHz
NUC1      1H
PQ        4.67 usec
PI        14.00 usec
PLW1     8.5607042 W

F2 - Processing parameters
SI        65536
SF        300.1600072 MHz
WDW       EM
SSB       0
LB        0.30 Hz
GB        0
PC        1.00
  
```

<sup>1</sup>H-NMR spectra (CDCl<sub>3</sub>, 300 MHz, 298 K) of compound **9.3**.

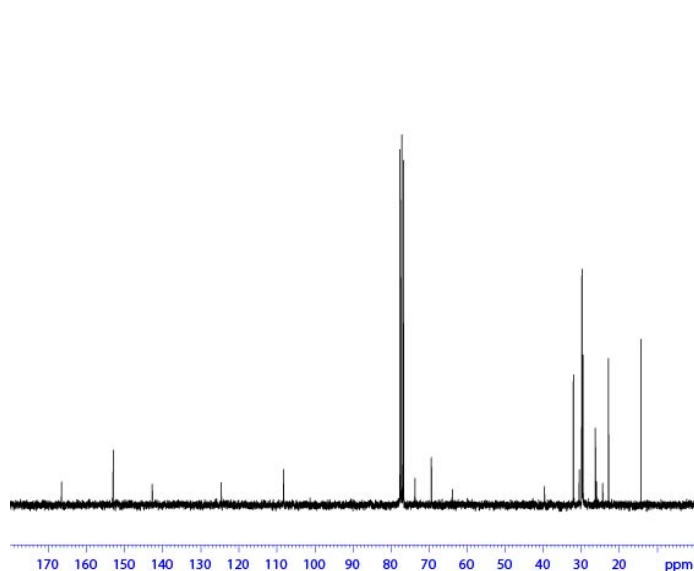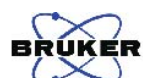

```

Current Data Parameters
NAME      Q05LLE18C
EXPNO    2
PROCNO   1

F2 - Acquisition Parameters
Date_    20230417
Time     11.57h
INSTRUM  Avance
PROBHD   Z104275_0507 (
PULPROG  zgpg30
TD        65536
SOLVENT  CDCl3
NS        400
DS        4
SWH       17857.143 Hz
FIDRES    0.544957 Hz
AQ        1.8350080 sec
RG        13.5
DW        28.000 usec
DE        6.50 usec
TE        298.0 K
D1        2.00000000 sec
D11       0.03000000 sec
TDO       1
SFO1     75.4633188 MHz
NUC1      13C
PQ        3.33 usec
PI        10.00 usec
PLW1     34.4199875 W
SFO2     300.1618006 MHz
NUC2      1H
CPDPRG2  waltz16
PCPD2    90.00 usec
PLW2     8.5607042 W
PLW12    0.20715000 W
PLW13    0.10419000 W

F2 - Processing parameters
SI        32768
SF        75.4752500 MHz
WDW       EM
SSB       0
LB        1.00 Hz
GB        0
PC        1.40
  
```

<sup>13</sup>C NMR spectra (CDCl<sub>3</sub>, 75 MHz, 298 K) of compound **9.3**.

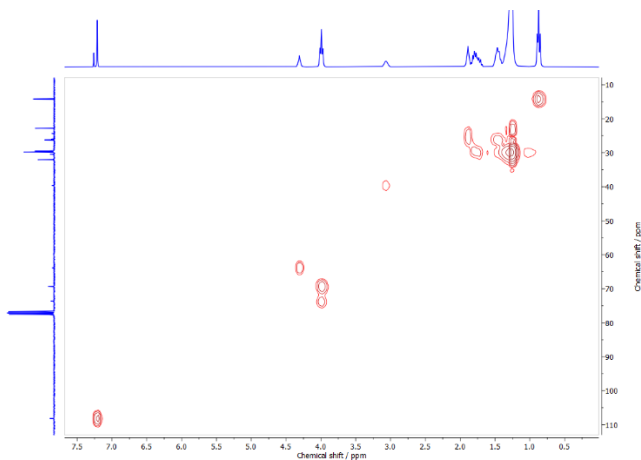

<sup>1</sup>H, <sup>13</sup>C HMQC spectra (CDCl<sub>3</sub>, 298 K) of compound **9.3**.

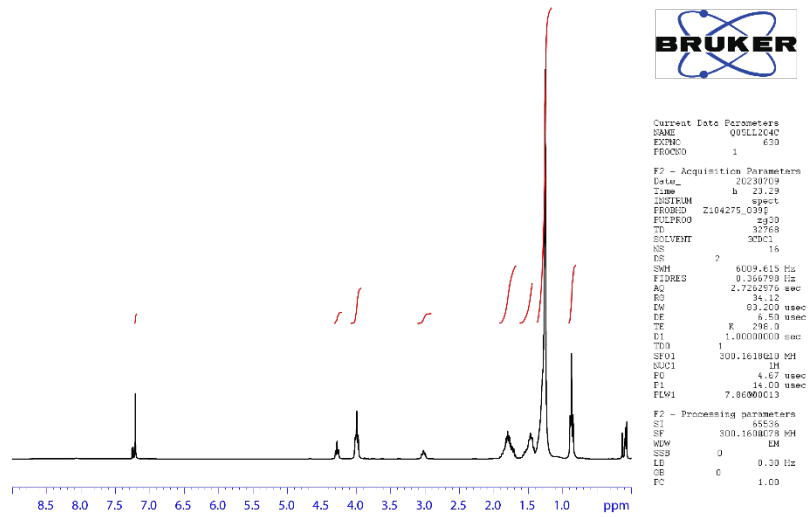

<sup>1</sup>H NMR spectra (CDCl<sub>3</sub>, 300 MHz, 298 K) of compound **9.4**.

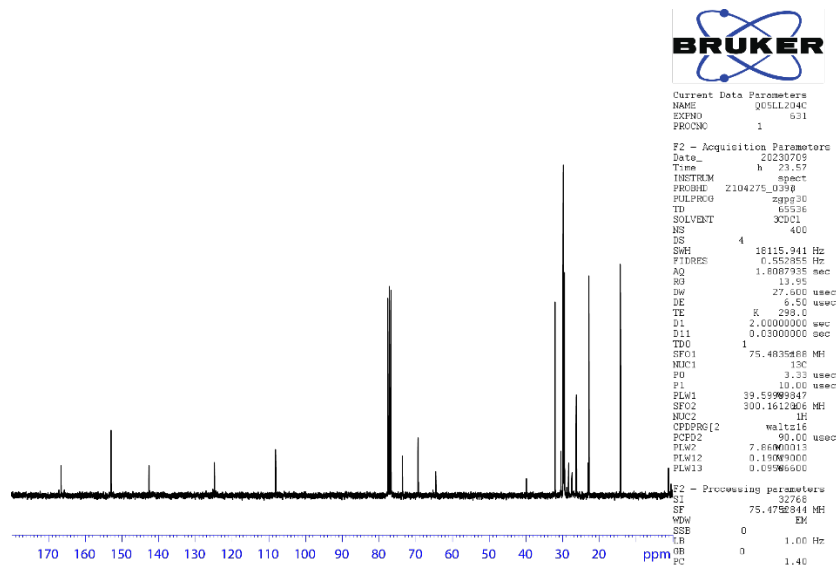

<sup>13</sup>C NMR spectra (CDCl<sub>3</sub>, 75 MHz, 298 K) of compound **9.4**.

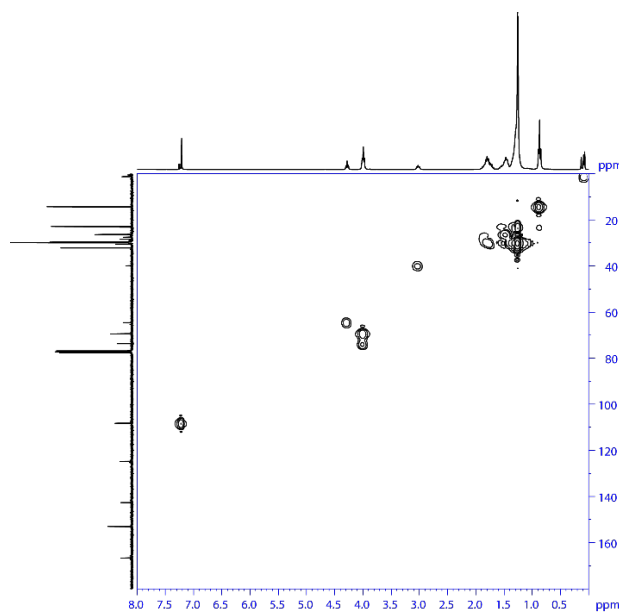

<sup>1</sup>H, <sup>13</sup>C HMQC spectra (CDCl<sub>3</sub>, 298 K) of compound **9.4**.

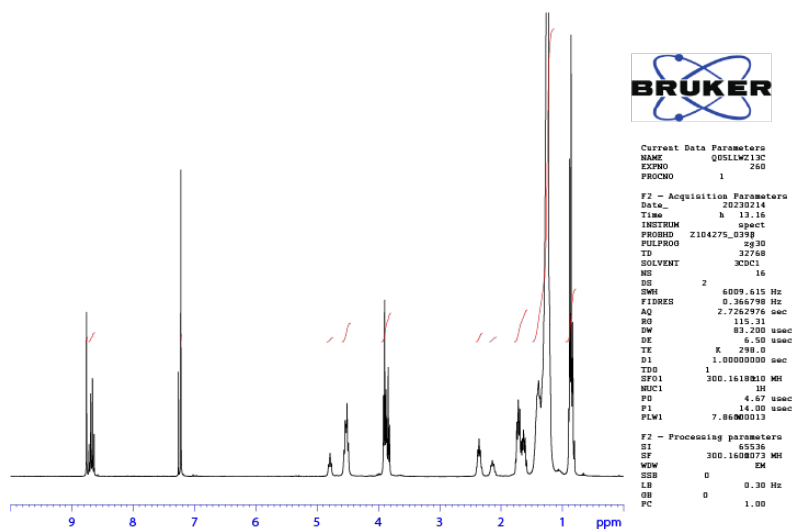

<sup>1</sup>H NMR spectra (CDCl<sub>3</sub>, 300 MHz, 298 K) of NPDI 2.

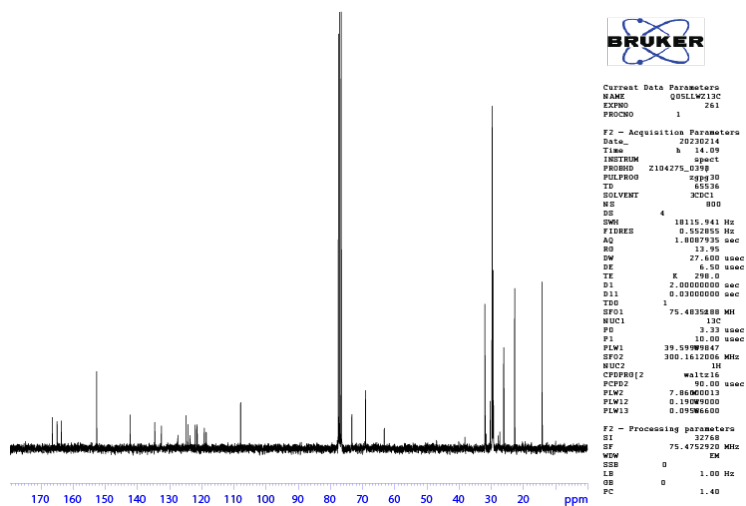

<sup>13</sup>C NMR spectra (CDCl<sub>3</sub>, 300 MHz, 298 K) of NPDI 2.

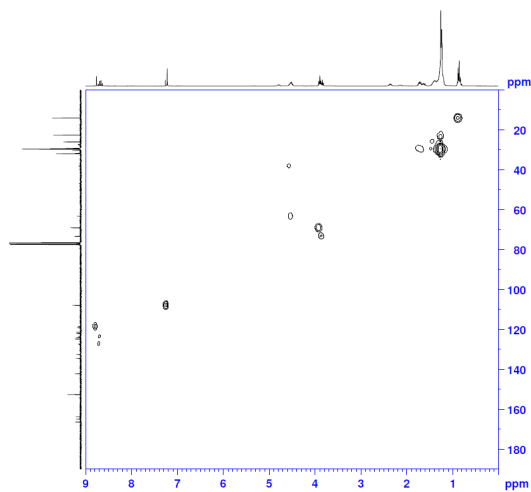

<sup>1</sup>H, <sup>13</sup>C HMQC spectra (CDCl<sub>3</sub>, 298K) of NPDI 2.

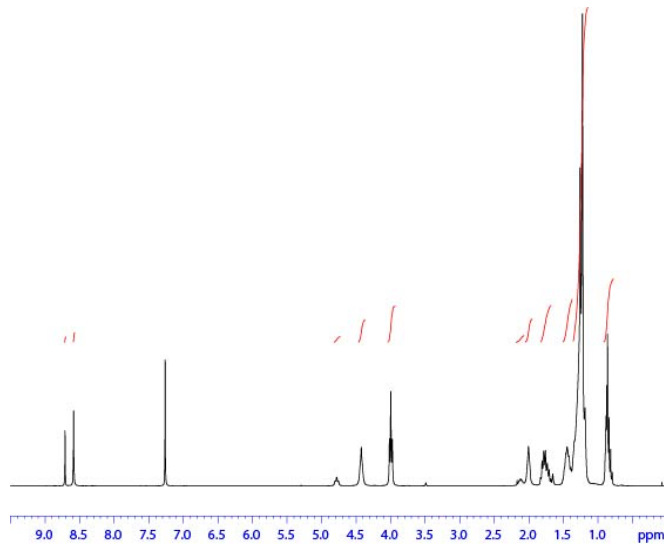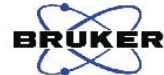

Current Data Parameters  
 NAME Q05LLE19C  
 EXPNO 290  
 PROCNO 1  
 F2 - Acquisition Parameters  
 Date\_ 20230419  
 Time 13.22 h  
 INSTRUM spect  
 PROBHD Z104275\_0393 ( )  
 PULPROG zg30  
 TD 32768  
 SOLVENT CDCl3  
 NS 16  
 DS 2  
 SWH 6099.615 Hz  
 FIDRES 0.366798 Hz  
 AQ 2.7262976 sec  
 RG 101.22  
 DW 83.200 usec  
 DE 6.50 usec  
 TE 298.0 K  
 D1 1.00000000 sec  
 TD0 1  
 SFO1 300.1618010 MHz  
 NUC1 1H  
 P0 4.67 usec  
 P1 14.00 usec  
 PLW1 7.86000013 W  
 F2 - Processing parameters  
 SI 65536  
 SF 300.1600069 MHz  
 WDW EM  
 SSB 0  
 LB 0.30 Hz  
 GB 0  
 PC 1.00

<sup>1</sup>H NMR spectra (CDCl<sub>3</sub>, 300 MHz, 298 K) of NPDI 3.

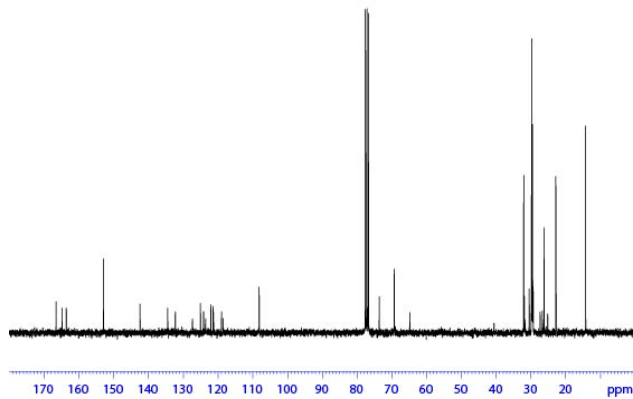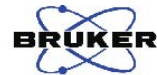

Current Data Parameters  
 NAME Q05LLE19C  
 EXPNO 291  
 PROCNO 1  
 F2 - Acquisition Parameters  
 Date\_ 20230419  
 Time 14.16 h  
 INSTRUM spect  
 PROBHD Z104275\_0393 ( )  
 PULPROG zgpg30  
 TD 65536  
 SOLVENT CDCl3  
 NS 4  
 DS 4  
 SWH 18115.941 Hz  
 FIDRES 0.552855 Hz  
 AQ 1.8087935 sec  
 RG 13.56  
 DW 27.400 usec  
 DE 6.50 usec  
 TE 298.0 K  
 D1 2.00000000 sec  
 D11 0.03000000 sec  
 TD0 1  
 SFO1 75.485188 MHz  
 NUC1 13C  
 P0 3.33 usec  
 P1 10.00 usec  
 PLW1 39.59999847 W  
 SFO2 300.1612056 MHz  
 NUC2 1H  
 CPDPRG2 waltz16  
 PCPD2 90.00 usec  
 PLW2 7.86000013 W  
 PLW12 0.19019000 W  
 PLW13 0.09566600 W  
 F2 - Processing parameters  
 SI 32768  
 SF 75.4732854 MHz  
 WDW EM  
 SSB 0  
 LB 1.00 Hz  
 GB 0  
 PC 1.40

<sup>13</sup>C NMR spectra (CDCl<sub>3</sub>, 75 MHz, 298 K) of NPDI 3.

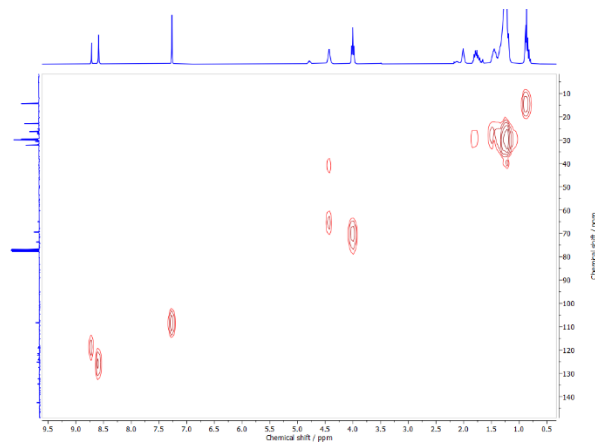

<sup>1</sup>H, <sup>13</sup>C HMQC spectra (CDCl<sub>3</sub>, 298 K) of NPDI 3.

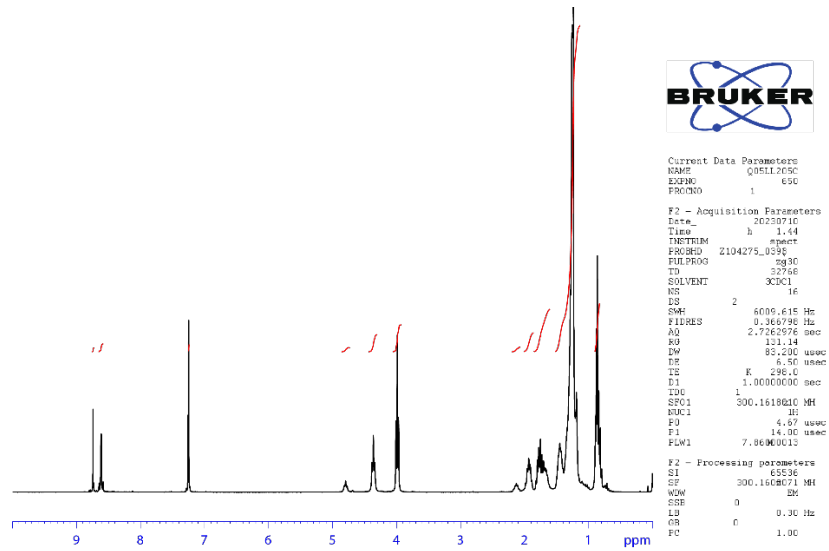

<sup>1</sup>H NMR spectra (CDCl<sub>3</sub>, 300 MHz, 298 K) of NPDI 4.

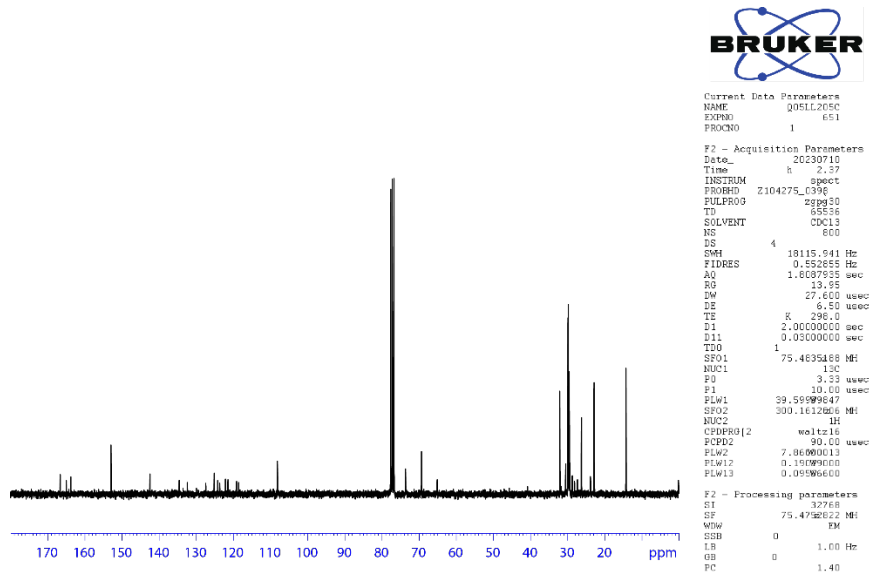

<sup>13</sup>C NMR spectra (CDCl<sub>3</sub>, 75 MHz, 298 K) of NPDI 4.

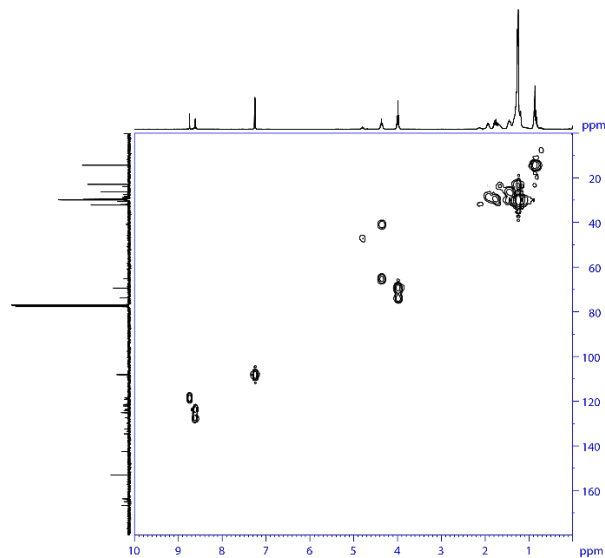

<sup>1</sup>H, <sup>13</sup>C HMQC spectra (CDCl<sub>3</sub>, 298 K) of NPDI 4.



#### 4. Supplementary Figures

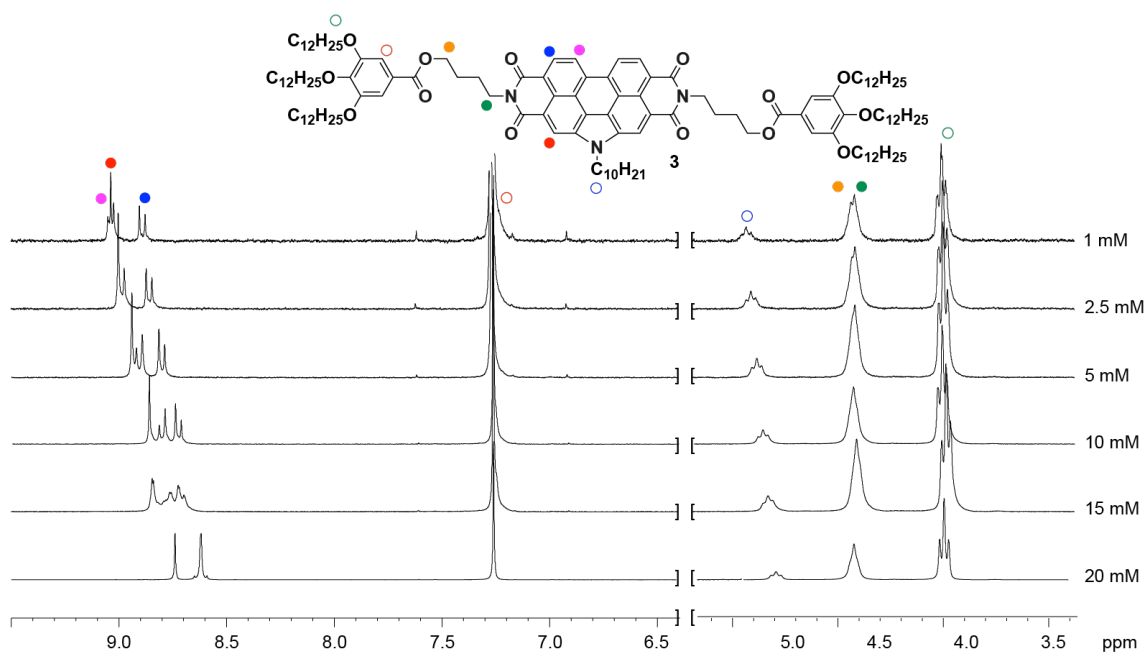

**Figure S1.** Partial  $^1\text{H}$  NMR spectra of **3** recorded at different concentrations showing the aromatic and some of the aliphatic protons ( $\text{CDCl}_3$ , 298 K, 300 MHz)

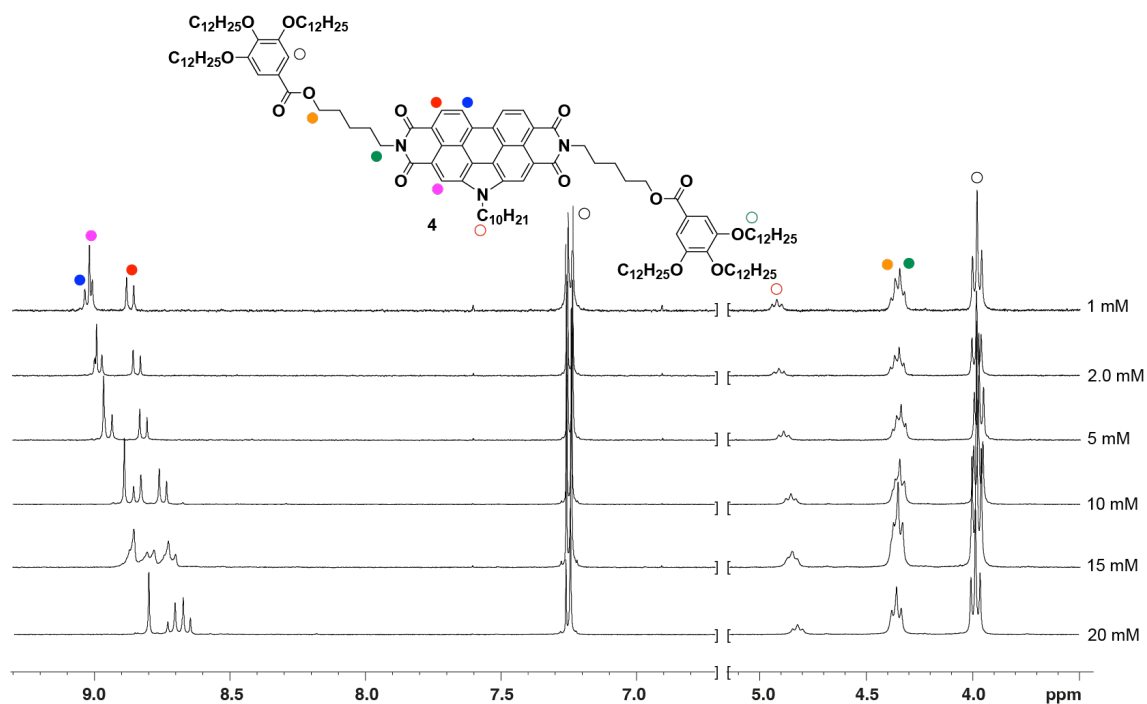

**Figure S2.** Partial  $^1\text{H}$  NMR spectra of **4** recorded at different concentrations showing the aromatic and some of the aliphatic protons ( $\text{CDCl}_3$ , 298 K, 300 MHz).

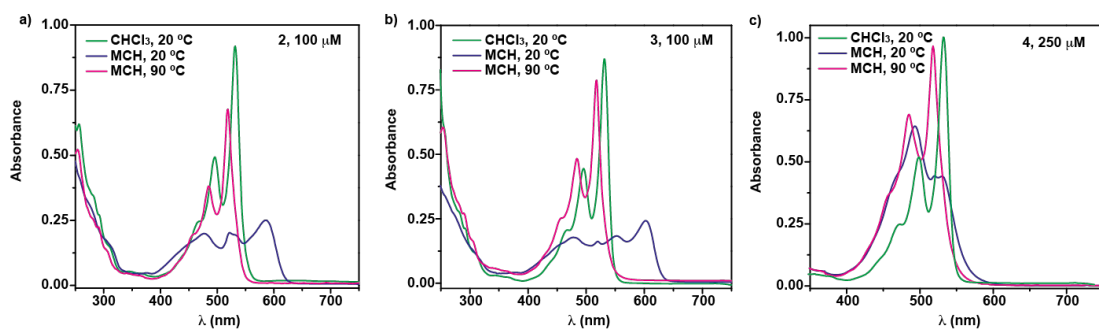

**Figure S3.** UV-Vis spectra of NPDIs **2** (a), **3** (b) and **4** (c) in different solvents and temperatures (pathlength: 1mm).

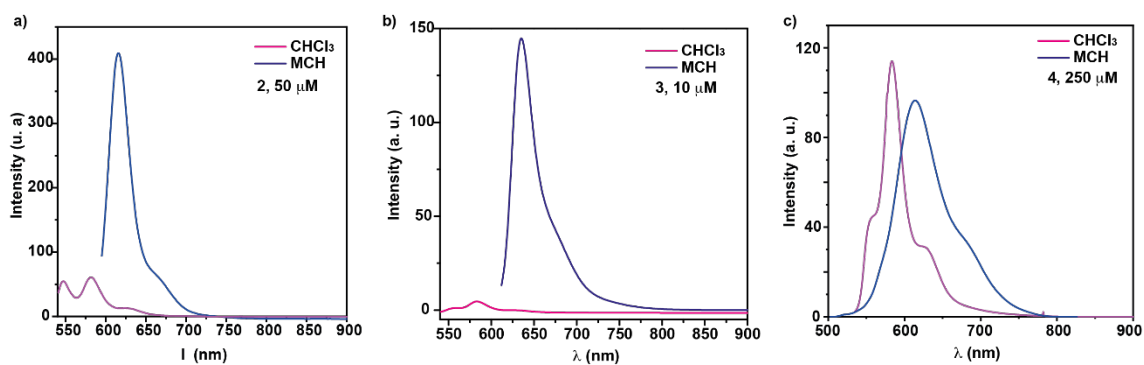

**Figure S4.** Emission spectra of NPDIs **2** (a), **3** (b) and **4** (c) in different solvents; ( $\lambda_{\text{ex}} = 531$  nm for CHCl<sub>3</sub>,  $\lambda_{\text{ex}} = 602$  nm for **2** and **3** in MCH,  $\lambda_{\text{ex}} = 596$  nm for **4** in MCH).

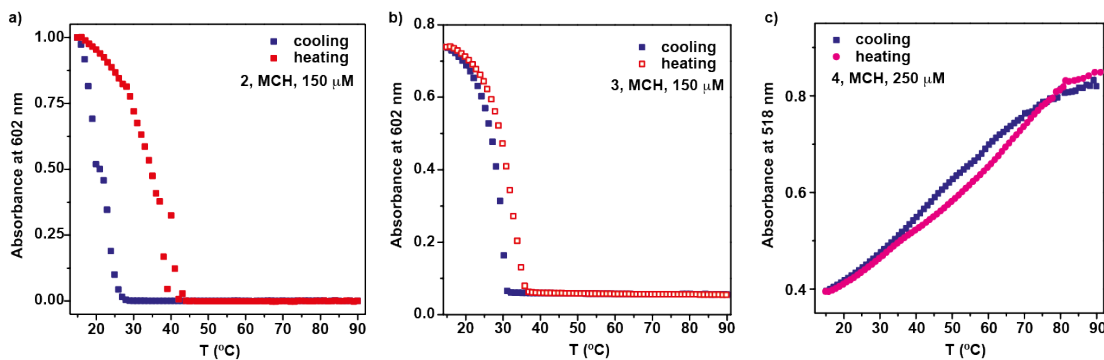

**Figure S5.** Heating and cooling curves for NPDIs **2** (a), **3** (b) and **4** (c) in MCH (1 K min<sup>-1</sup>, pathlength: 1mm).

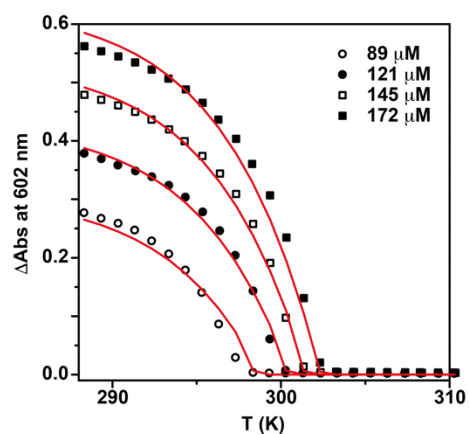

**Figure S6.** Zoomed plot of the variation of absorbance at  $\lambda = 602$  nm versus temperature for **3** at a cooling rate of 1 Kmin<sup>-1</sup>. The red traces depict the fitting of the equilibrium (EQ) model to the experimental curves.

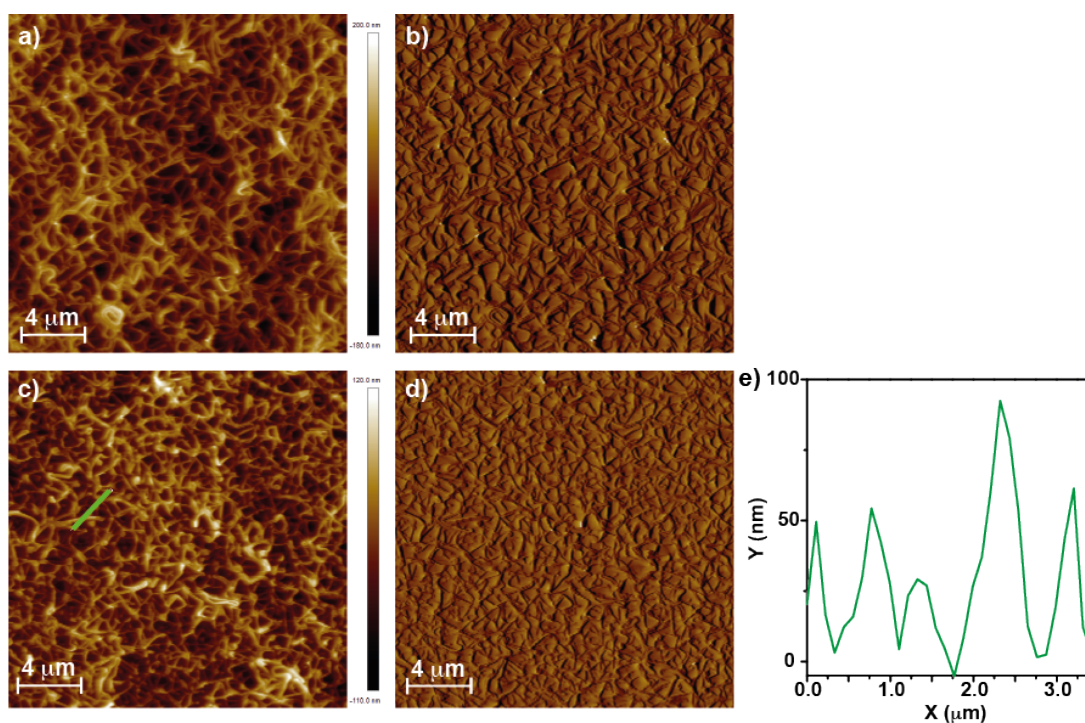

**Figure S7.** Height (a, c) and phase (b, d) AFM images of the supramolecular polymers formed upon self-assembly of **2** in MCH ( $c_T = 150$   $\mu$ M, spin-coated, HOPG as surface). Panel (e) shows the height profile along the green line in panel (c).

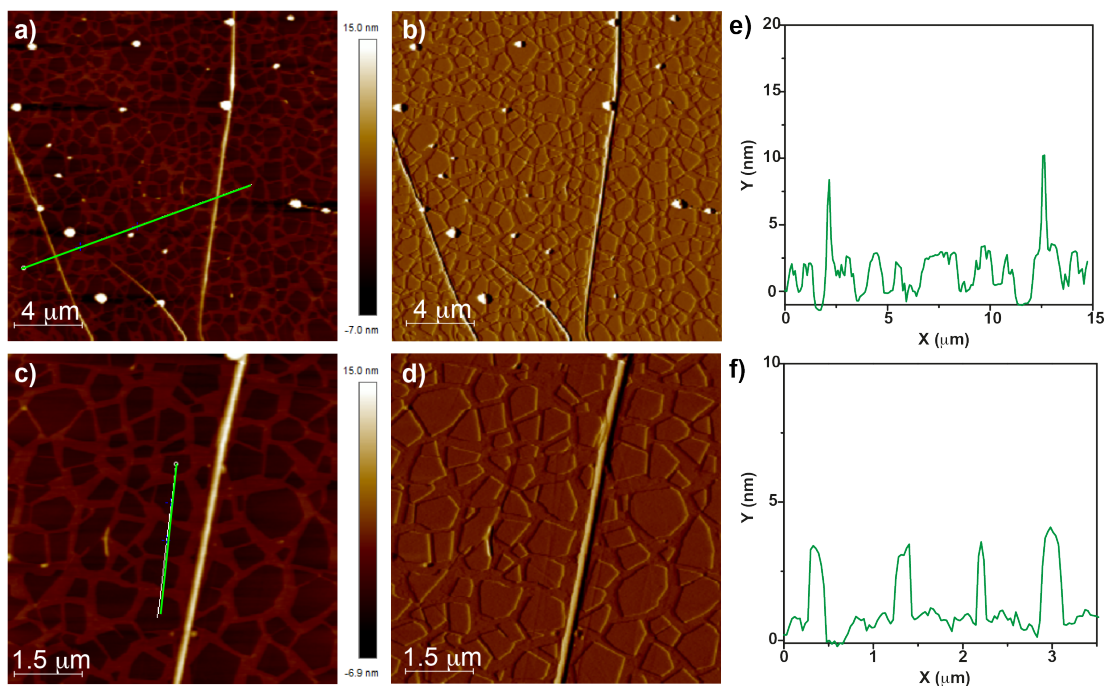

**Figure S8.** Height (a, c) and phase (b, d) AFM images of the supramolecular polymers formed upon self-assembly of **3** in MCH ( $c_T = 150 \mu\text{M}$ , HOPG as surface). Panels (e) and (f) show the height profile along the green lines in panels (a) and (c).

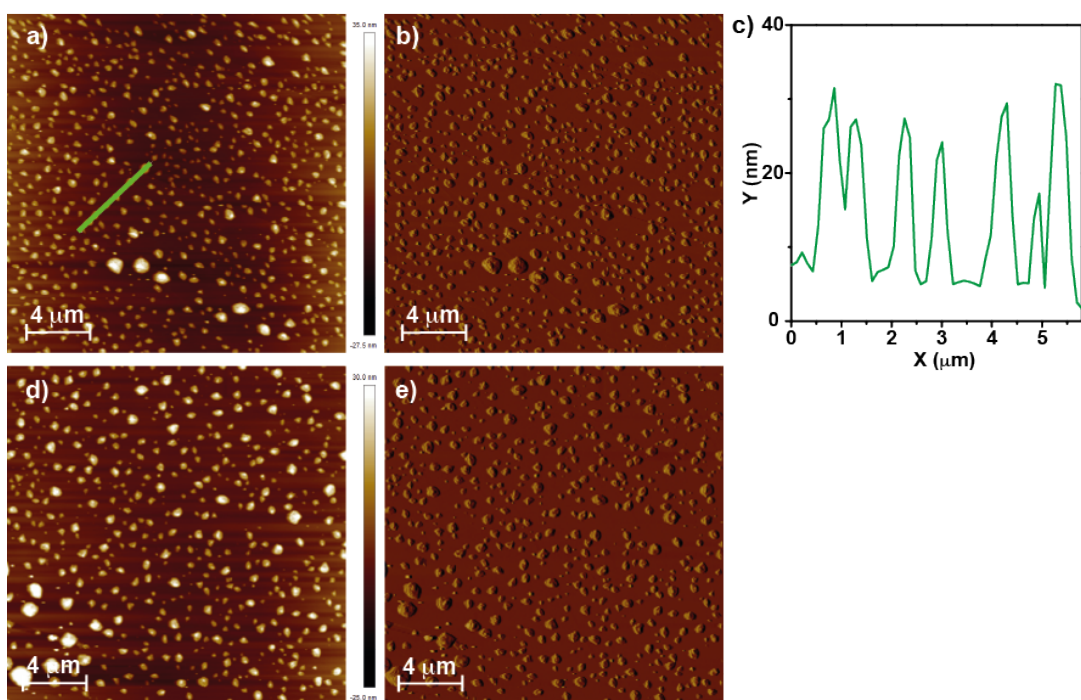

**Figure S9.** Height (a, d) and phase (b, e) AFM images of the supramolecular polymers formed upon self-assembly of **4** in MCH ( $c_T = 200 \mu\text{M}$ , spin coated, HOPG as surface). Panel (c) shows the height profile along the green line in panel (a).

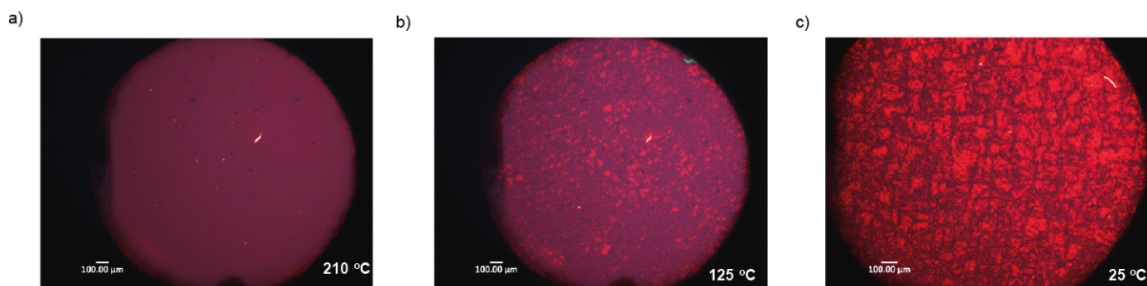

**Figure S10.** POM images of NPDI 1 at a) 210 °C, b) 125 °C and c) 25 °C obtained upon cooling from the isotropic melt (5 K min<sup>-1</sup>).

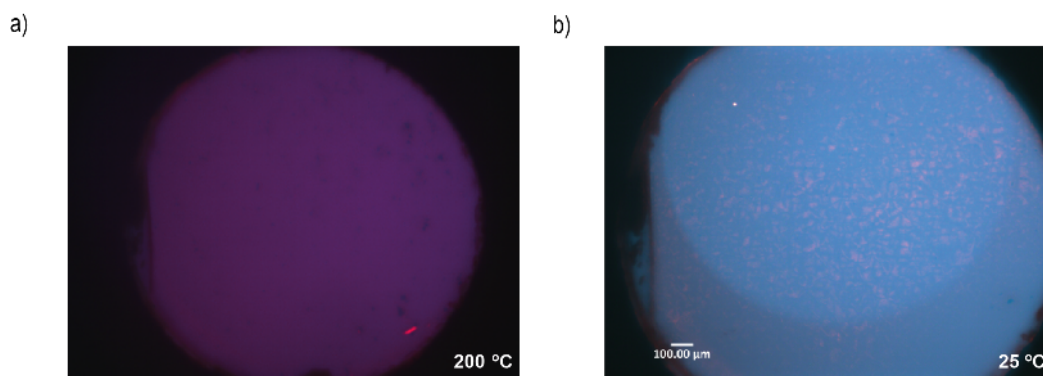

**Figure S11.** POM images of NPDI 2 at a) 200 °C and b) 25 °C (5 K min<sup>-1</sup>).

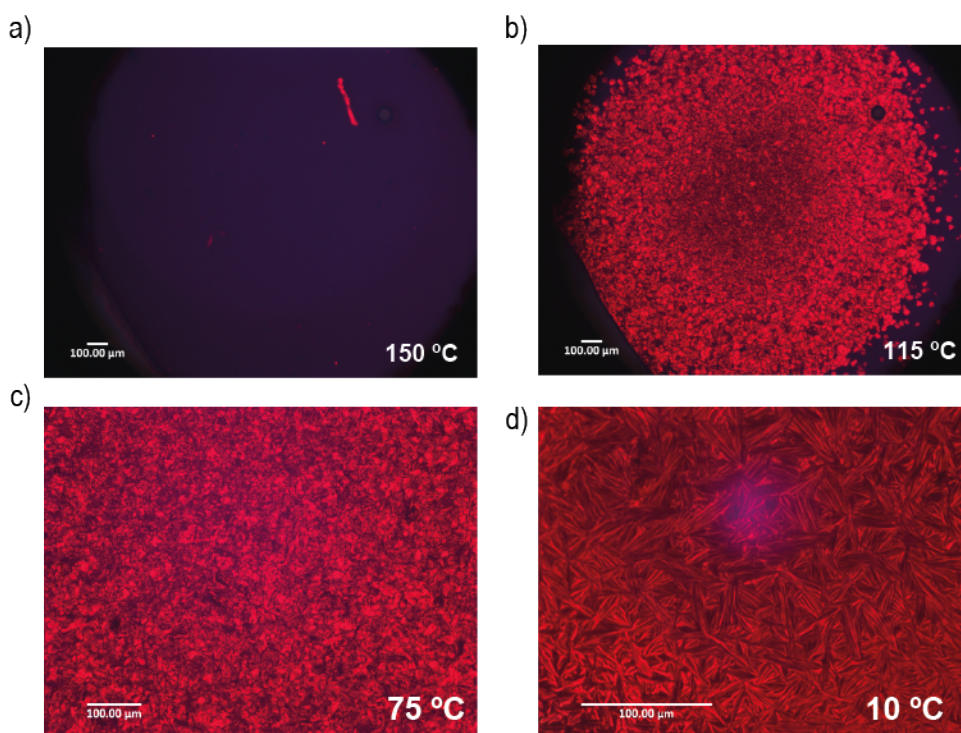

**Figure S12.** POM images of NPDI 3 at a) 150 °C, b) 115 °C, c) 75 °C and d) 10 °C obtained upon cooling from the isotropic melt (5 K min<sup>-1</sup>).

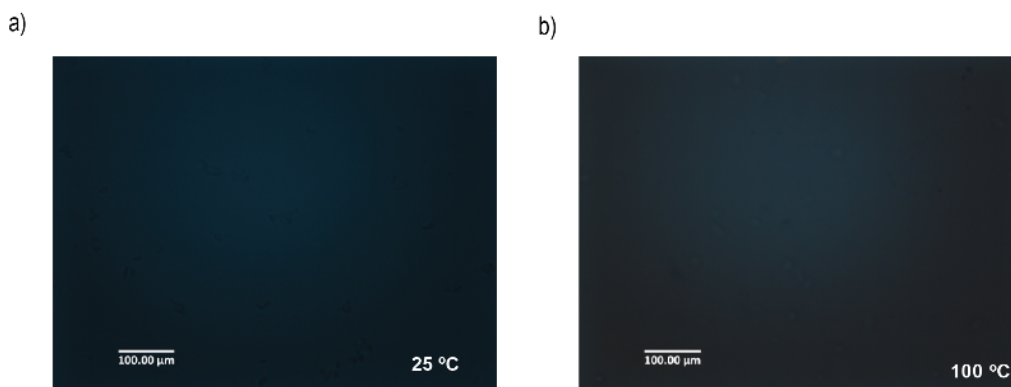

**Figure S13.** POM images of NPDI 4 at a) 25 °C and b) 105 °C (5 K min<sup>-1</sup>).

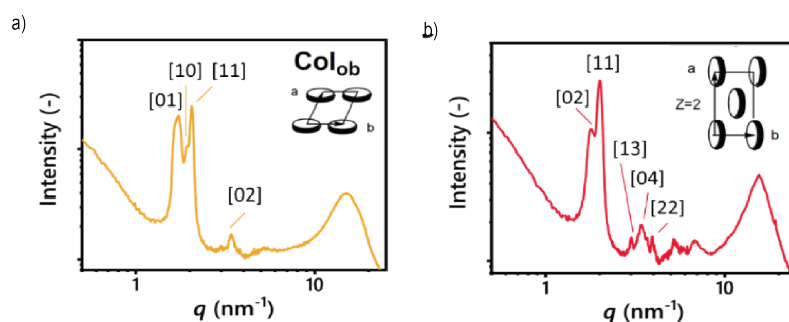

**Figure S14.** 1D transmission scattering profiles of NPDI 3 showing the morphologies at a) 75 °C and b) -10 °C.

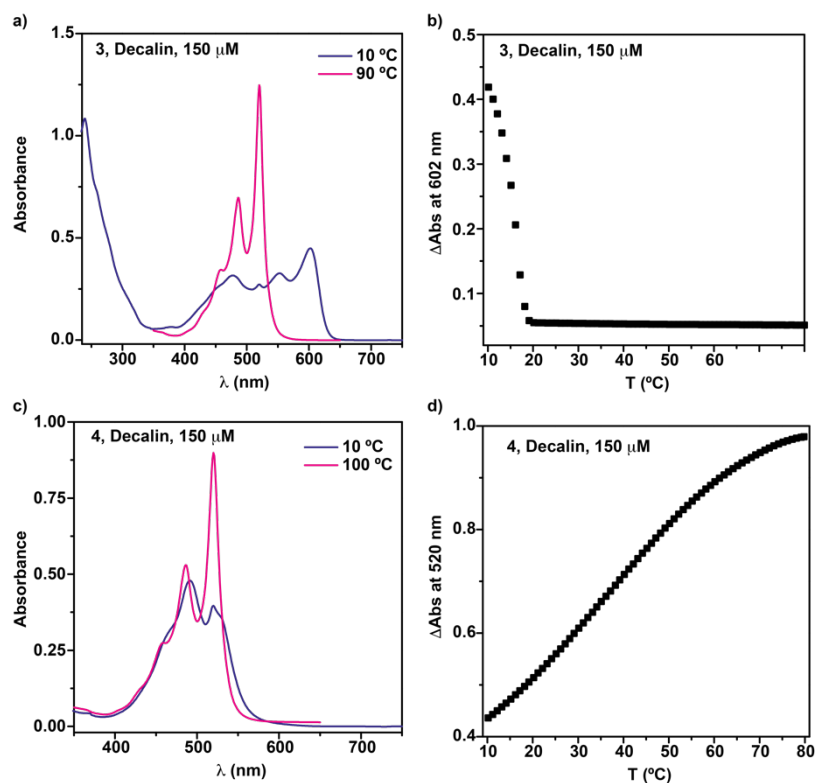

**Figure SM1.** (a and c) UV-Vis spectra at different temperatures of NPDI 3 (a) and 4 (c) in decalin as solvent; (b and d) cooling curves of NPDI 3 (b) and 4 (d) in decalin at a scan rate of 1K/min ( $c_T = 150 \mu\text{M}$ ).

**Table S1.** Summary of data obtained from SAXS studies.

| Name        | # C-atoms in spacer (-) | Observed phase                         | Lattice parameters                  |
|-------------|-------------------------|----------------------------------------|-------------------------------------|
| <b>Even</b> |                         |                                        |                                     |
| 1           | 2                       | LC (120 °C) = Col <sub>obl</sub> (P2m) | a = 3.4 nm<br>b = 3.9 nm<br>γ = 86° |
|             |                         | C = Col <sub>h</sub>                   | a = 3.2 nm                          |
| 3           | 4                       | LC (115 °C) = Col <sub>obl</sub> (P2m) | a = 3.5 nm<br>b = 3.9 nm<br>γ = 69° |
|             |                         | LC (75 °C) = Col <sub>obl</sub> (P2m)  | a = 3.5 nm<br>b = 3.8 nm<br>γ = 68° |
|             |                         | C = Col <sub>obl</sub> (C2/m)          | a = 3.5 nm<br>b = 7.1 nm<br>γ = 82° |
| <b>Odd</b>  |                         |                                        |                                     |
| 2           | 3                       | Col <sub>h</sub>                       | a = 3.3 nm                          |
| 4           | 5                       | Col <sub>h</sub>                       | a = 4.6 nm                          |

**Table S2.** Detailed explanation of the Miller Planes belonging to each peak. Peak positions (q) are taken from the SAXS spectra, observed domain spacing is calculated using the equation  $d = 2\pi/q$ .

| Name            | Peak position (nm <sup>-1</sup> ) | Observed domain spacing (nm) | Calculated domain spacing (nm) | Miller Indices |
|-----------------|-----------------------------------|------------------------------|--------------------------------|----------------|
| 1 (LC – 120 °C) | 1.61                              | 3.90                         | 3.90                           | [010]          |
|                 | 1.84                              | 3.41                         | 3.41                           | [100]          |
|                 | 2.35                              | 2.67                         | 2.66                           | [110]          |
|                 | 3.08                              | 2.04                         | 1.95                           | [020]          |
|                 | 3.66                              | 1.72                         | 1.71                           | [200]          |
| 3 (LC – 115 °C) | 1.71                              | 3.67                         | 3.67                           | [010]          |
|                 | 1.92                              | 3.27                         | 3.27                           | [100]          |
|                 | 2.07                              | 3.04                         | 3.05                           | [110]          |
|                 | 3.42                              | 1.84                         | 1.84                           | [020]          |
| 3 (LC – 75 °C)  | 1.78                              | 3.53                         | 3.53                           | [010]          |
|                 | 1.94                              | 3.24                         | 3.24                           | [100]          |
|                 | 2.06                              | 3.05                         | 3.01                           | [110]          |
|                 | 3.00                              | 2.09                         | 2.04                           | [110]          |
|                 | 3.50                              | 1.80                         | 1.76                           | [020]          |
| 3 (C – -10 °C)  | 1.79                              | 3.51                         | 3.51                           | [020]          |
|                 | 2.02                              | 3.11                         | 3.11                           | [110]          |
|                 | 3.01                              | 2.09                         | 2.08                           | [130]          |
|                 | 3.46                              | 1.82                         | 1.76                           | [040]/[200]    |
|                 | 3.72                              | 1.69                         | 1.65                           | [220]          |

## 5. References

- (S1) ten Eikelder, H. M. M.; Markvoort, A. J.; de Greef, T. F. A.; Hilbers, P. A. J. An equilibrium model for chiral amplification in supramolecular polymers. *J. Phys. Chem. B* **2012**, *116*, 5291–5301.
- (S2) (a) Greciano, E. E.; Matarranz, B.; Sánchez, L. Pathway Complexity Versus Hierarchical Self-Assembly in N-Annulated Perylenes: Structural Effects in Seeded Supramolecular Polymerization. *Angew. Chem. Int. Ed.* **2018**, *57*, 4697–4701. (b) Dorca, Y.; Naranjo, C.; Ghosh, G.; Gómez, R.; Fernández, G.; Sánchez, L. Unconventional Chiral Amplification in Luminescent Supramolecular Polymers Based on Trisbiphenylaminetricarboxamides. *Organic Materials* **2020**, *2*, 41–46. (c) Naranjo, C.; Dorca, Y.; Ghosh, G.; Gómez, R.; Fernández, G.; Sánchez, L. Chaincapper effect to bias the amplification of asymmetry in supramolecular polymers. *Chem. Comm.* **2021**, *57*, 4500–4503.
- (S3) Gupta, R. K.; Pathak, S. K.; Pradhan, B.; Rao, D. S. S.; Prasad, S. K.; Achalkumar, A. S. Self-assembly of luminescent N-annulated perylene tetraesters into fluid columnar phases. *Soft Matter* **2015**, *11*, 3629–3636; b) Gupta, R. K.; Rao, D. S.; Prasad, S. K.; Achalkumar, A. S. Columnar Self-Assembly of Electron-Deficient Dendronized Bay-Annulated Perylene Bisimides. *Chem. Eur. J.* **2018**, *24*, 3566–3575.
- (S4) Martínez, M. A.; Doncel-Giménez, A.; Cerdá, J.; Calbo, J.; Rodríguez, R.; Aragón, J.; Crassous, J.; Ortí, E.; Sánchez L. Distance Matters: Biasing Mechanism, Transfer of Asymmetry, and Stereomutation in N-Annulated Perylene Bisimide Supramolecular Polymers. *J. Am. Chem. Soc.* **2021**, *143*, 13281–13291.
